# Supplementary material for: Effects of Topical Anaesthetic and Buccal Meloxicam Treatments on Concurrent Castration and Dehorning of Beef Calves
Source: Preprints.org preprint supplement (doi:10.20944/preprints201801.0294.v1), 2018-01-31
Supplement: Supplementary file 1 [file supplementary]

## Sheet: Weight gain
CALF ID	TREATMENT	WEIGHT DAY 0	WEIGHT DAY 6	WEIGHT CHANGE
248	TA	121.5	120.5	-1
38	TA	123.5	123.5	0
91	CON POS	128	122.5	-5.5
90	TA + BUCC	130.5	125.5	-5
205	TA + BUCC	133	137.5	4.5
18	TA	135.5	135.5	0
183	TA	141	143	2
4	BUCC	143	137.5	-5.5
160	TA + BUCC	143	147.5	4.5
101	CON POS	143.5	141.5	-2
24	BUCC	147	135	-12
32	CON NEG	147	141.5	-5.5
115	TA + BUCC	149	145.5	-3.5
155	TA + BUCC	149	143	-6
230	TA + BUCC	149	151	2
208	TA	150	143.5	-6.5
39	BUCC	152.5	146	-6.5
216	CON POS	152.5	154.5	2
33	TA	153.5	151.5	-2
13	CON NEG	154	149	-5
242	CON NEG	154.5	145.5	-9
5	TA + BUCC	155	153.5	-1.5
188	TA	155	149	-6
145	TA + BUCC	155.5	154.5	-1
207	CON NEG	155.5	150.5	-5
164	BUCC	156	156	0
178	TA	156	157	1
68	TA	156.5	153	-3.5
16	CON POS	157	159	2
238	TA	158.5	150	-8.5
236	CON POS	159	164.5	5.5
110	TA + BUCC	160	157.5	-2.5
96	CON POS	161	152.5	-8.5
168	TA	161.5	159.5	-2
31	CON POS	162	156.5	-5.5
41	CON POS	162	162	0
211	CON POS	162	155.5	-6.5
54	BUCC	163.5	161	-2.5
93	TA	163.5	161	-2.5
150	TA + BUCC	163.5	160.5	-3
87	CON NEG	164	154	-10
30	TA + BUCC	165.5	155.5	-10
174	BUCC	166	159.5	-6.5
231	CON POS	166.5	176	9.5
3	TA	167	162.5	-4.5
119	BUCC	167	161.5	-5.5
191	CON POS	167	166.5	-0.5
53	TA	167.5	166	-1.5
22	CON NEG	168	170.5	2.5
47	CON NEG	168.5	166	-2.5
83	TA	168.5	158	-10.5
200	TA + BUCC	168.5	159.5	-9
114	BUCC	169	167.5	-1.5
143	TA	169	157.5	-11.5
14	BUCC	169.5	159	-10.5
100	TA + BUCC	169.5	160.5	-9
139	BUCC	170	167.5	-2.5
249	BUCC	170	164	-6
142	CON NEG	170.5	165	-5.5
163	TA	170.5	165	-5.5
152	CON NEG	171.5	171	-0.5
181	CON POS	171.5	174.5	3
25	TA + BUCC	172	154.5	-17.5
120	TA	172	171.5	-0.5
240	TA + BUCC	172	162	-10
88	TA	172.5	163.5	-9
125	TA + BUCC	173	167.5	-5.5
1	CON POS	174.5	171.5	-3
35	TA + BUCC	175	178.5	3.5
121	CON POS	175	165	-10
190	TA + BUCC	175	177	2
193	TA	176	177.5	1.5
71	CON POS	176.5	178	1.5
189	BUCC	176.5	180	3.5
215	TA + BUCC	176.5	171.5	-5
221	CON POS	176.5	170	-6.5
158	TA	177.5	178.5	1
15	TA + BUCC	178	169.5	-8.5
81	CON POS	178	163.5	-14.5
146	CON POS	178	170.5	-7.5
20	TA + BUCC	180	176	-4
227	CON NEG	181	172	-9
98	TA	181.5	170	-11.5
140	TA + BUCC	181.5	170.5	-11
65	TA + BUCC	182	179	-3
70	TA + BUCC	182	174.5	-7.5
49	BUCC	182.5	171.5	-11
156	CON POS	182.5	178	-4.5
182	CON NEG	182.5	176.5	-6
237	CON NEG	182.5	166	-16.5
69	BUCC	183	175	-8
234	BUCC	183	177	-6
244	BUCC	183	178.5	-4.5
8	TA	183.5	174	-9.5
109	BUCC	184.5	174.5	-10
177	CON NEG	184.5	171.5	-13
6	CON POS	185	179.5	-5.5
80	TA + BUCC	185	181.5	-3.5
129	BUCC	185	177.5	-7.5
111	CON POS	185.5	186.5	1
130	TA + BUCC	185.5	188	2.5
161	CON POS	185.5	181	-4.5
43	TA	186	178	-8
82	CON NEG	186	167.5	-18.5
157	CON NEG	186	179.5	-6.5
233	TA	186	177	-9
64	BUCC	186.5	181	-5.5
76	CON NEG	186.5	188.5	2
78	TA	186.5	169	-17.5
105	TA + BUCC	186.5	187.5	1
117	CON NEG	187	186	-1
210	TA + BUCC	187.5	181	-6.5
26	CON POS	188	190	2
134	BUCC	188.5	178	-10.5
239	BUCC	189	179.5	-9.5
137	CON NEG	189.5	183.5	-6
104	BUCC	190.5	187.5	-3
112	CON NEG	190.5	183	-7.5
94	BUCC	191.5	180	-11.5
107	CON NEG	191.5	188	-3.5
36	CON POS	192	190	-2
57	CON NEG	192.5	180	-12.5
184	BUCC	192.5	193	0.5
128	TA	193	184	-9
162	CON NEG	193	184	-9
224	BUCC	193	178	-15
223	TA	195	176	-19
72	CON NEG	195.5	190	-5.5
86	CON POS	195.5	190	-5.5
232	CON NEG	195.5	189.5	-6
166	CON POS	196	192.5	-3.5
126	CON POS	197	203	6
229	BUCC	197	192.5	-4.5
171	CON POS	197.5	198.5	1
204	BUCC	197.5	198	0.5
62	CON NEG	198.5	187	-11.5
67	CON NEG	198.5	184	-14.5
124	BUCC	199.5	195.5	-4
147	CON NEG	199.5	196	-3.5
141	CON POS	200	190	-10
217	CON NEG	200	184.5	-15.5
79	BUCC	201	201	0
7	CON NEG	202	191	-11
40	TA + BUCC	202	198.5	-3.5
58	TA	202	195	-7
74	BUCC	202	193	-9
185	TA + BUCC	202	192	-10
194	BUCC	202	193.5	-8.5
199	BUCC	202	193	-9
225	TA + BUCC	205	202	-3
28	TA	206	205	-1
247	CON NEG	207	199.5	-7.5
42	TA	208	206	-2
66	CON POS	208	187.5	-20.5
133	TA	208	203	-5
73	TA	209	198	-11
89	BUCC	209	199	-10
206	CON POS	209	209	0
99	BUCC	211	210	-1
113	TA	211	203	-8
135	TA + BUCC	211	195.5	-15.5
179	BUCC	211	205	-6
226	CON POS	211	204	-7
48	TA	212	202	-10
149	BUCC	212	208	-4
153	TA	213	206	-7
170	TA + BUCC	213	208	-5
176	CON POS	213	202	-11
116	CON POS	214	214	0
17	CON NEG	215	180	-35
102	CON NEG	215	207	-8
97	CON NEG	216	206	-10
118	TA	216	200	-16
175	TA + BUCC	216	210	-6
169	BUCC	217	212	-5
201	CON POS	217	217	0
46	CON POS	218	210	-8
59	BUCC	218	206	-12
122	CON NEG	219	207	-12
132	CON NEG	219	210	-9
151	CON POS	219	222	3
187	CON NEG	219	218	-1
198	TA	219	215	-4
63	TA	220
228	TA	220	215	-5
243	TA	220	221	1
9	BUCC	221	210	-11
21	CON POS	221	210	-11
214	BUCC	221	218	-3
12	CON NEG	222	210	-12
77	CON NEG	222	216	-6
213	TA	222	203	-19
55	TA + BUCC	223	217	-6
29	BUCC	224	216	-8
34	BUCC	224	213	-11
52	CON NEG	224	218	-6
11	CON POS	225	220	-5
154	BUCC	225	202	-23
235	TA + BUCC	227	228	1
56	CON POS	228	218	-10
127	CON NEG	228	219	-9
222	CON NEG	228	224	-4
19	BUCC	230	221	-9
144	BUCC	230	224	-6
203	TA + BUCC	231	221	-10
209	BUCC	231	218	-13
60	TA + BUCC	232	225	-7
103	TA	232	223	-9
75	TA + BUCC	233	233	0
138	TA	233	229	-4
173	TA	233	226	-7
2	CON NEG	234	225	-9
45	TA + BUCC	234	217	-17
186	CON POS	234	237	3
212	CON NEG	235	220	-15
61	CON POS	236	229	-7
123	TA	237	233	-4
196	CON POS	237	231	-6
250	TA + BUCC	237	229	-8
202	CON NEG	238	229	-9
37	CON NEG	239	218	-21
95	TA + BUCC	241	233	-8
92	CON NEG	242
50	TA + BUCC	243	217	-26
85	TA + BUCC	245	242	-3
136	CON POS	245	231	-14
180	TA + BUCC	245	222	-23
10	TA + BUCC	246	231	-15
51	CON POS	246	239	-7
23	TA	248	241	-7
167	CON NEG	251	242	-9
241	CON POS	251	248	-3
159	BUCC	253	256	3
246	CON POS	254	255	1
219	BUCC	255	242	-13
106	CON POS	257	239	-18
84	BUCC	262	249	-13
220	TA + BUCC	266	251	-15
131	CON POS	267	262	-5
148	TA	271	252	-19
192	CON NEG	273	267	-6
44	BUCC	275	264	-11
218	TA	277	270	-7
195	TA + BUCC	278
165	TA + BUCC	281	276	-5
197	CON NEG	284	260	-24
108	TA	296	277	-19
172	CON NEG	308	292	-16
245	TA + BUCC	329	296	-33
27	CON NEG	338	324	-14

## Sheet: Paddock utilisation
GPS UNIT NUMBER	TREATMENT	DAY	95% MINIMUM CONVEX POLYGON
2	CONP	1	271.129
2	CONP	2	689.232
2	CONP	3	1.6295
2	CONP	4	*
2	CONP	5	*
5	CONP	1	84.769
5	CONP	2	268.464
5	CONP	3	167.286
5	CONP	4	5.54345
5	CONP	5	*
6	CONP	1	81.9549
6	CONP	2	487.351
6	CONP	3	224.345
6	CONP	4	169.797
6	CONP	5	303.473
21	CONP	1	284.367
21	CONP	2	968.123
21	CONP	3	161.185
21	CONP	4	67.9966
21	CONP	5	74.109
26	CONP	1	98.3311
26	CONP	2	760.579
26	CONP	3	70.0247
26	CONP	4	74.8167
26	CONP	5	161.187
4	CONP	1	243.937
4	CONP	2	373.054
4	CONP	3	150.495
4	CONP	4	53.9669
4	CONP	5	109.182
38	CONP	1	89.833
38	CONP	2	892.941
38	CONP	3	122.546
38	CONP	4	94.6636
38	CONP	5	32.9096
42	CONP	1	12.2451
42	CONP	2	827.381
42	CONP	3	63.2208
42	CONP	4	36.3569
42	CONP	5	107.639
44	CONP	1	8.2458
44	CONP	2	595.816
44	CONP	3	141.946
44	CONP	4	115.517
44	CONP	5	70.301
58	CONP	1	10.5533
58	CONP	2	465.724
58	CONP	3	154.27
58	CONP	4	77.2473
58	CONP	5	113.82
59	CONP	1	237.551
59	CONP	2	301.399
59	CONP	3	154.48
59	CONP	4	55.0299
59	CONP	5	96.4381
63	CONP	1	8.83985
63	CONP	2	676.861
63	CONP	3	31.9654
63	CONP	4	92.1145
63	CONP	5	270.129
65	CONP	1	5.61815
65	CONP	2	827.298
65	CONP	3	80.5028
65	CONP	4	53.1506
65	CONP	5	80.9473
69	CONP	1	248.015
69	CONP	2	674.649
69	CONP	3	98.8824
69	CONP	4	2.4795
69	CONP	5	*
4411	CONP	1	3.61625
4411	CONP	2	790.609
4411	CONP	3	171.761
4411	CONP	4	168.869
4411	CONP	5	112.709
4413	CONP	1	27.7643
4413	CONP	2	360.034
4413	CONP	3	159.552
4413	CONP	4	23.9909
4413	CONP	5	56.1281
9	CONN	1	253.221
9	CONN	2	396.061
9	CONN	3	191.162
9	CONN	4	116.785
9	CONN	5	120.297
14	CONN	1	38.8589
14	CONN	2	914.198
14	CONN	3	0.16515
14	CONN	4	*
14	CONN	5	*
23	CONN	1	232.116
23	CONN	2	376.559
23	CONN	3	141.459
23	CONN	4	50.1382
23	CONN	5	88.695
25	CONN	1	102.175
25	CONN	2	1145.11
25	CONN	3	65.073
25	CONN	4	37.0352
25	CONN	5	152.08
2	CONN	1	267.559
2	CONN	2	1084.52
2	CONN	3	123.466
2	CONN	4	74.7906
2	CONN	5	122.416
33	CONN	1	10.4294
33	CONN	2	638.489
33	CONN	3	36.2995
33	CONN	4	51.5181
33	CONN	5	13.7892
39	CONN	1	150.367
39	CONN	2	296.264
39	CONN	3	192.576
39	CONN	4	24.0134
39	CONN	5	37.1066
43	CONN	1	208.154
43	CONN	2	397.532
43	CONN	3	135.279
43	CONN	4	75.9164
43	CONN	5	1.30655
46	CONN	1	5.6183
46	CONN	2	1128.73
46	CONN	3	169.844
46	CONN	4	45.0655
46	CONN	5	95.8257
51	CONN	1	89.7228
51	CONN	2	718.448
51	CONN	3	182.583
51	CONN	4	137.725
51	CONN	5	169.183
60	CONN	1	274.035
60	CONN	2	768.609
60	CONN	3	28.5033
60	CONN	4	49.0241
60	CONN	5	21.7787
62	CONN	1	7.6626
62	CONN	2	624.337
62	CONN	3	48.361
62	CONN	4	58.3013
62	CONN	5	124.442
67	CONN	1	6.0284
67	CONN	2	595.432
67	CONN	3	203.433
67	CONN	4	32.7132
67	CONN	5	92.7334
70	CONN	1	261.09
70	CONN	2	685.902
70	CONN	3	142.313
70	CONN	4	38.1579
70	CONN	5	323.947
4404	CONN	1	75.4537
4404	CONN	2	459.262
4404	CONN	3	276.236
4404	CONN	4	21.1303
4404	CONN	5	321.154
4406	CONN	1	0.5859
4406	CONN	2	405.446
4406	CONN	3	191.038
4406	CONN	4	122.864
4406	CONN	5	350.473
4423	CONN	1	2.716
4423	CONN	2	655.203
4423	CONN	3	85.3805
4423	CONN	4	45.9819
4423	CONN	5	49.3957
4426	CONN	1	33.2994
4426	CONN	2	1126.72
4426	CONN	3	153.98
4426	CONN	4	83.3899
4426	CONN	5	49.4615
22	TA	1	256.768
22	TA	2	445.651
22	TA	3	79.7649
22	TA	4	65.3459
22	TA	5	131.313
24	TA	1	14.7217
24	TA	2	628.066
24	TA	3	26.6312
24	TA	4	30.7831
24	TA	5	45.7116
5	TA	1	18.3527
5	TA	2	1011.06
5	TA	3	145.28
5	TA	4	55.8235
5	TA	5	124.769
36	TA	1	91.37
36	TA	2	714.142
36	TA	3	188.998
36	TA	4	66.7344
36	TA	5	32.5538
41	TA	1	3.3952
41	TA	2	457.547
41	TA	3	94.956
41	TA	4	70.5066
41	TA	5	105.145
48	TA	1	6.97205
48	TA	2	1105.49
48	TA	3	385.19
48	TA	4	27.7646
48	TA	5	164.083
55	TA	1	91.6669
55	TA	2	881.276
55	TA	3	222.94
55	TA	4	191.766
55	TA	5	247.704
71	TA	1	258.171
71	TA	2	1266.63
71	TA	3	388.239
71	TA	4	54.4262
71	TA	5	311.297
4399	TA	1	6.31455
4399	TA	2	305.184
4399	TA	3	57.499
4399	TA	4	88.9502
4399	TA	5	89.2917
4402	TA	1	85.92
4402	TA	2	815.305
4402	TA	3	21.3381
4402	TA	4	80.6102
4402	TA	5	70.4601
4407	TA	1	234.418
4407	TA	2	1148.15
4407	TA	3	215.657
4407	TA	4	112.347
4407	TA	5	342.198
4416	TA	1	72.1476
4416	TA	2	776.897
4416	TA	3	66.2489
4416	TA	4	80.5389
4416	TA	5	348.548
442	TA	1	10.6264
442	TA	2	575.163
442	TA	3	92.6852
442	TA	4	89.5782
442	TA	5	50.1014
444	TA	1	3.76705
444	TA	2	809.443
444	TA	3	171.781
444	TA	4	48.9935
444	TA	5	126.673
4432	TA	1	9.6545
4432	TA	2	839.501
4432	TA	3	96.4128
4432	TA	4	65.4737
4432	TA	5	252.697
3	BM	1	96.5712
3	BM	2	865.047
3	BM	3	223.858
3	BM	4	106.516
3	BM	5	245.892
4403	BM	1	5.68645
4403	BM	2	281.66
4403	BM	3	173.892
4403	BM	4	79.7502
4403	BM	5	243.515
4415	BM	1	76.0491
4415	BM	2	823.37
4415	BM	3	41.8826
4415	BM	4	58.2178
4415	BM	5	17.601
4425	BM	1	7.9473
4425	BM	2	801.255
4425	BM	3	180.905
4425	BM	4	49.4062
4425	BM	5	207.732
441	BM	1	0.4704
441	BM	2	812.65
441	BM	3	76.2478
441	BM	4	73.2667
441	BM	5	167.147
8	BMTA	1	54.1044
8	BMTA	2	352.242
8	BMTA	3	76.4681
8	BMTA	4	25.3754
8	BMTA	5	61.9637
15	BMTA	1	275.534
15	BMTA	2	594.879
15	BMTA	3	102.647
15	BMTA	4	63.727
15	BMTA	5	36.5577
17	BMTA	1	5.01765
17	BMTA	2	828.391
17	BMTA	3	59.7831
17	BMTA	4	67.0344
17	BMTA	5	370.794
19	BMTA	1	264.334
19	BMTA	2	701.728
19	BMTA	3	98.9553
19	BMTA	4	131.607
19	BMTA	5	201.267
1	BMTA	1	8.4847
1	BMTA	2	423.824
1	BMTA	3	82.1679
1	BMTA	4	77.0588
1	BMTA	5	0.357
3	BMTA	1	7.59045
3	BMTA	2	1052.05
3	BMTA	3	231.816
3	BMTA	4	111.069
3	BMTA	5	351.093
32	BMTA	1	4.4619
32	BMTA	2	386.764
32	BMTA	3	81.1178
32	BMTA	4	40.1468
32	BMTA	5	25.5919
50	BMTA	1	256.855
50	BMTA	2	1204.05
50	BMTA	3	269.678
50	BMTA	4	52.1112
50	BMTA	5	81.4013
53	BMTA	1	83.2013
53	BMTA	2	1366.85
53	BMTA	3	186.568
53	BMTA	4	29.8253
53	BMTA	5	300.49
57	BMTA	1	7.491
57	BMTA	2	637.658
57	BMTA	3	75.8595
57	BMTA	4	84.3884
57	BMTA	5	120.657
64	BMTA	1	256.998
64	BMTA	2	982.565
64	BMTA	3	143.843
64	BMTA	4	59.3332
64	BMTA	5	353.269
4400	BMTA	1	215.972
4400	BMTA	2	227.401
4400	BMTA	3	165.382
4400	BMTA	4	92.7753
4400	BMTA	5	315.132
4401	BMTA	1	7.50325
4401	BMTA	2	404.547
4401	BMTA	3	144.561
4401	BMTA	4	21.7839
4401	BMTA	5	52.4147
4409	BMTA	1	3.6622
4409	BMTA	2	609.843
4409	BMTA	3	240.037
4409	BMTA	4	172.126
4409	BMTA	5	148.455
4410	BMTA	1	74.5675
4410	BMTA	2	382.879
4410	BMTA	3	86.3337
4410	BMTA	4	74.0729
4410	BMTA	5	100.277
4417	BMTA	1	221.727
4417	BMTA	2	417.438
4417	BMTA	3	90.6492
4417	BMTA	4	32.1234
4417	BMTA	5	74.7439
4422	BMTA	1	35.5093
4422	BMTA	2	803.071
4422	BMTA	3	82.4363
4422	BMTA	4	61.1005
4422	BMTA	5	46.1762

## Sheet: Lying activity
CALF ID	WEIGHT	TREATMENT	DAY	STANDING (1) or LYING (0)
1	174.5	CONP	1	0
1	174.5	CONP	1	0
1	174.5	CONP	1	0
1	174.5	CONP	1	0
1	174.5	CONP	1	0
1	174.5	CONP	1	0
1	174.5	CONP	1	0
1	174.5	CONP	1	0
1	174.5	CONP	1	0
1	174.5	CONP	1	0
1	174.5	CONP	1	0
1	174.5	CONP	1	0
1	174.5	CONP	1	0
1	174.5	CONP	1	0
1	174.5	CONP	1	0
1	174.5	CONP	1	0
1	174.5	CONP	1	0
1	174.5	CONP	1	0
1	174.5	CONP	1	0
1	174.5	CONP	1	0
1	174.5	CONP	1	0
1	174.5	CONP	1	0
1	174.5	CONP	1	0
1	174.5	CONP	1	0
1	174.5	CONP	1	0
1	174.5	CONP	1	0
1	174.5	CONP	1	0
1	174.5	CONP	1	0
1	174.5	CONP	1	0
1	174.5	CONP	1	0
1	174.5	CONP	1	0
1	174.5	CONP	1	0
1	174.5	CONP	1	0
1	174.5	CONP	1	0
1	174.5	CONP	1	0
1	174.5	CONP	1	0
1	174.5	CONP	1	0
1	174.5	CONP	1	0
1	174.5	CONP	1	0
1	174.5	CONP	1	0
1	174.5	CONP	1	0
1	174.5	CONP	1	0
1	174.5	CONP	1	0
1	174.5	CONP	1	0
1	174.5	CONP	1	0
1	174.5	CONP	1	0
1	174.5	CONP	1	0
1	174.5	CONP	1	0
1	174.5	CONP	1	0
1	174.5	CONP	1	0
1	174.5	CONP	1	0
1	174.5	CONP	1	0
1	174.5	CONP	1	0
1	174.5	CONP	1	0
1	174.5	CONP	1	0
1	174.5	CONP	1	0
1	174.5	CONP	1	0
1	174.5	CONP	1	0
1	174.5	CONP	1	0
1	174.5	CONP	1	0
1	174.5	CONP	1	0
1	174.5	CONP	1	0
1	174.5	CONP	1	0
1	174.5	CONP	1	0
1	174.5	CONP	1	0
1	174.5	CONP	1	0
1	174.5	CONP	1	0
1	174.5	CONP	1	0
1	174.5	CONP	1	0
1	174.5	CONP	1	1
1	174.5	CONP	1	1
1	174.5	CONP	1	1
1	174.5	CONP	1	1
1	174.5	CONP	1	1
1	174.5	CONP	1	1
1	174.5	CONP	1	1
1	174.5	CONP	1	1
1	174.5	CONP	1	1
1	174.5	CONP	1	1
1	174.5	CONP	1	1
1	174.5	CONP	1	1
1	174.5	CONP	1	1
1	174.5	CONP	1	1
1	174.5	CONP	1	1
1	174.5	CONP	1	1
1	174.5	CONP	1	1
1	174.5	CONP	1	1
1	174.5	CONP	1	1
1	174.5	CONP	1	1
1	174.5	CONP	1	1
1	174.5	CONP	1	1
1	174.5	CONP	1	1
1	174.5	CONP	1	1
1	174.5	CONP	1	1
1	174.5	CONP	1	1
1	174.5	CONP	1	1
1	174.5	CONP	1	1
1	174.5	CONP	1	1
1	174.5	CONP	1	1
1	174.5	CONP	1	1
1	174.5	CONP	1	1
1	174.5	CONP	1	1
1	174.5	CONP	1	1
1	174.5	CONP	1	1
1	174.5	CONP	1	1
1	174.5	CONP	1	1
1	174.5	CONP	1	1
1	174.5	CONP	1	1
1	174.5	CONP	1	1
1	174.5	CONP	1	1
1	174.5	CONP	1	1
1	174.5	CONP	1	1
1	174.5	CONP	1	1
1	174.5	CONP	1	1
1	174.5	CONP	1	1
1	174.5	CONP	1	1
1	174.5	CONP	1	1
1	174.5	CONP	1	1
1	174.5	CONP	1	1
1	174.5	CONP	1	1
1	174.5	CONP	1	1
1	174.5	CONP	1	1
1	174.5	CONP	1	1
1	174.5	CONP	1	1
1	174.5	CONP	1	1
1	174.5	CONP	1	1
1	174.5	CONP	1	1
1	174.5	CONP	1	1
1	174.5	CONP	1	1
1	174.5	CONP	1	1
1	174.5	CONP	1	1
1	174.5	CONP	1	1
1	174.5	CONP	1	1
1	174.5	CONP	1	1
1	174.5	CONP	1	1
1	174.5	CONP	1	1
1	174.5	CONP	1	1
1	174.5	CONP	1	1
1	174.5	CONP	1	1
1	174.5	CONP	1	1
1	174.5	CONP	1	1
1	174.5	CONP	1	1
1	174.5	CONP	1	1
1	174.5	CONP	1	1
1	174.5	CONP	1	1
1	174.5	CONP	1	1
1	174.5	CONP	1	1
1	174.5	CONP	1	1
1	174.5	CONP	1	1
1	174.5	CONP	1	1
1	174.5	CONP	1	1
1	174.5	CONP	1	1
1	174.5	CONP	1	1
1	174.5	CONP	1	1
1	174.5	CONP	1	1
1	174.5	CONP	1	1
1	174.5	CONP	1	1
1	174.5	CONP	1	1
1	174.5	CONP	1	1
1	174.5	CONP	1	1
1	174.5	CONP	1	1
1	174.5	CONP	1	1
1	174.5	CONP	1	1
1	174.5	CONP	1	1
1	174.5	CONP	1	1
1	174.5	CONP	1	1
1	174.5	CONP	1	1
1	174.5	CONP	1	1
1	174.5	CONP	1	1
1	174.5	CONP	1	1
1	174.5	CONP	1	1
1	174.5	CONP	1	1
1	174.5	CONP	1	1
1	174.5	CONP	1	1
1	174.5	CONP	1	1
1	174.5	CONP	1	1
1	174.5	CONP	1	1
1	174.5	CONP	1	1
1	174.5	CONP	1	1
1	174.5	CONP	1	1
1	174.5	CONP	1	1
1	174.5	CONP	1	1
1	174.5	CONP	1	1
1	174.5	CONP	1	1
1	174.5	CONP	1	1
1	174.5	CONP	1	1
1	174.5	CONP	1	1
1	174.5	CONP	1	1
1	174.5	CONP	1	1
1	174.5	CONP	1	1
1	174.5	CONP	1	1
1	174.5	CONP	1	1
1	174.5	CONP	1	1
1	174.5	CONP	1	1
1	174.5	CONP	1	1
1	174.5	CONP	1	1
1	174.5	CONP	1	1
1	174.5	CONP	1	1
1	174.5	CONP	1	1
1	174.5	CONP	1	1
1	174.5	CONP	1	1
1	174.5	CONP	1	1
1	174.5	CONP	1	1
1	174.5	CONP	1	1
1	174.5	CONP	1	1
1	174.5	CONP	1	1
1	174.5	CONP	1	1
1	174.5	CONP	1	1
1	174.5	CONP	1	1
1	174.5	CONP	1	1
1	174.5	CONP	1	1
1	174.5	CONP	1	1
1	174.5	CONP	1	1
1	174.5	CONP	1	1
1	174.5	CONP	1	1
1	174.5	CONP	1	1
1	174.5	CONP	1	1
1	174.5	CONP	1	1
1	174.5	CONP	1	1
1	174.5	CONP	1	1
1	174.5	CONP	1	1
1	174.5	CONP	1	1
1	174.5	CONP	1	1
1	174.5	CONP	1	1
1	174.5	CONP	1	1
1	174.5	CONP	1	1
1	174.5	CONP	1	1
1	174.5	CONP	1	1
1	174.5	CONP	1	1
1	174.5	CONP	1	1
1	174.5	CONP	1	1
1	174.5	CONP	1	1
1	174.5	CONP	1	1
1	174.5	CONP	1	1
1	174.5	CONP	1	1
1	174.5	CONP	1	1
1	174.5	CONP	1	1
1	174.5	CONP	1	1
1	174.5	CONP	1	1
1	174.5	CONP	1	1
1	174.5	CONP	1	1
1	174.5	CONP	1	1
1	174.5	CONP	1	1
1	174.5	CONP	1	1
1	174.5	CONP	1	1
1	174.5	CONP	1	1
1	174.5	CONP	1	1
1	174.5	CONP	1	1
1	174.5	CONP	1	1
1	174.5	CONP	1	1
1	174.5	CONP	1	1
1	174.5	CONP	1	1
1	174.5	CONP	1	1
1	174.5	CONP	1	1
1	174.5	CONP	1	1
1	174.5	CONP	1	1
1	174.5	CONP	1	1
1	174.5	CONP	1	1
1	174.5	CONP	1	1
1	174.5	CONP	1	1
1	174.5	CONP	1	1
1	174.5	CONP	1	1
1	174.5	CONP	1	1
1	174.5	CONP	1	0
1	174.5	CONP	1	0
1	174.5	CONP	1	0
1	174.5	CONP	1	0
1	174.5	CONP	1	0
1	174.5	CONP	1	0
1	174.5	CONP	1	0
1	174.5	CONP	1	0
1	174.5	CONP	1	0
1	174.5	CONP	1	0
1	174.5	CONP	1	0
1	174.5	CONP	1	0
1	174.5	CONP	1	0
1	174.5	CONP	1	0
1	174.5	CONP	1	0
1	174.5	CONP	1	0
1	174.5	CONP	1	0
1	174.5	CONP	1	0
1	174.5	CONP	1	0
1	174.5	CONP	1	0
1	174.5	CONP	1	0
1	174.5	CONP	1	0
1	174.5	CONP	1	0
1	174.5	CONP	1	0
1	174.5	CONP	1	0
1	174.5	CONP	1	0
1	174.5	CONP	1	0
1	174.5	CONP	1	0
1	174.5	CONP	1	0
1	174.5	CONP	1	0
1	174.5	CONP	1	0
1	174.5	CONP	1	0
1	174.5	CONP	1	0
1	174.5	CONP	1	0
1	174.5	CONP	1	0
1	174.5	CONP	1	0
1	174.5	CONP	1	0
1	174.5	CONP	1	0
1	174.5	CONP	1	0
1	174.5	CONP	1	0
1	174.5	CONP	1	0
1	174.5	CONP	1	0
1	174.5	CONP	1	0
1	174.5	CONP	1	0
1	174.5	CONP	1	0
1	174.5	CONP	1	0
1	174.5	CONP	1	0
1	174.5	CONP	1	0
1	174.5	CONP	1	0
1	174.5	CONP	1	0
1	174.5	CONP	1	0
1	174.5	CONP	1	0
1	174.5	CONP	1	0
1	174.5	CONP	1	0
1	174.5	CONP	1	0
1	174.5	CONP	1	0
1	174.5	CONP	1	0
1	174.5	CONP	1	0
1	174.5	CONP	1	0
1	174.5	CONP	1	0
1	174.5	CONP	1	0
1	174.5	CONP	1	0
1	174.5	CONP	1	0
1	174.5	CONP	1	0
1	174.5	CONP	1	0
1	174.5	CONP	1	0
1	174.5	CONP	1	0
1	174.5	CONP	1	0
1	174.5	CONP	1	0
1	174.5	CONP	1	0
1	174.5	CONP	1	0
1	174.5	CONP	1	0
1	174.5	CONP	1	0
1	174.5	CONP	1	0
1	174.5	CONP	1	0
1	174.5	CONP	1	0
1	174.5	CONP	1	0
1	174.5	CONP	1	0
1	174.5	CONP	1	0
1	174.5	CONP	1	0
1	174.5	CONP	1	0
1	174.5	CONP	1	0
1	174.5	CONP	1	0
1	174.5	CONP	1	0
1	174.5	CONP	1	0
1	174.5	CONP	1	0
1	174.5	CONP	1	0
1	174.5	CONP	1	0
1	174.5	CONP	1	0
1	174.5	CONP	1	0
1	174.5	CONP	1	0
1	174.5	CONP	1	0
1	174.5	CONP	1	0
1	174.5	CONP	1	0
1	174.5	CONP	1	0
1	174.5	CONP	1	0
1	174.5	CONP	1	0
1	174.5	CONP	1	0
1	174.5	CONP	1	0
1	174.5	CONP	1	0
1	174.5	CONP	1	0
1	174.5	CONP	1	0
1	174.5	CONP	1	0
1	174.5	CONP	1	0
1	174.5	CONP	1	0
1	174.5	CONP	1	0
1	174.5	CONP	1	0
1	174.5	CONP	1	0
1	174.5	CONP	1	0
1	174.5	CONP	1	0
1	174.5	CONP	1	0
1	174.5	CONP	1	0
1	174.5	CONP	1	0
1	174.5	CONP	1	0
1	174.5	CONP	1	0
1	174.5	CONP	1	0
1	174.5	CONP	1	0
1	174.5	CONP	1	0
1	174.5	CONP	1	0
1	174.5	CONP	1	0
1	174.5	CONP	1	0
1	174.5	CONP	1	0
1	174.5	CONP	1	0
1	174.5	CONP	1	0
1	174.5	CONP	1	0
1	174.5	CONP	1	0
1	174.5	CONP	1	0
1	174.5	CONP	1	0
1	174.5	CONP	1	0
1	174.5	CONP	1	0
1	174.5	CONP	1	0
1	174.5	CONP	1	0
1	174.5	CONP	1	0
1	174.5	CONP	1	0
1	174.5	CONP	1	0
1	174.5	CONP	1	0
1	174.5	CONP	1	0
1	174.5	CONP	1	0
1	174.5	CONP	1	0
1	174.5	CONP	1	0
1	174.5	CONP	1	0
1	174.5	CONP	1	0
1	174.5	CONP	1	0
1	174.5	CONP	1	0
1	174.5	CONP	1	0
1	174.5	CONP	1	0
1	174.5	CONP	1	0
1	174.5	CONP	1	0
1	174.5	CONP	1	0
1	174.5	CONP	1	0
1	174.5	CONP	1	0
1	174.5	CONP	1	0
1	174.5	CONP	1	0
1	174.5	CONP	1	0
1	174.5	CONP	1	0
1	174.5	CONP	1	0
1	174.5	CONP	1	0
1	174.5	CONP	1	0
1	174.5	CONP	1	0
1	174.5	CONP	1	0
1	174.5	CONP	1	0
1	174.5	CONP	1	0
1	174.5	CONP	1	0
1	174.5	CONP	1	0
1	174.5	CONP	1	0
1	174.5	CONP	1	0
1	174.5	CONP	1	0
1	174.5	CONP	1	0
1	174.5	CONP	1	0
1	174.5	CONP	1	0
1	174.5	CONP	1	0
1	174.5	CONP	1	0
1	174.5	CONP	1	0
1	174.5	CONP	1	0
1	174.5	CONP	1	0
1	174.5	CONP	1	0
1	174.5	CONP	1	0
1	174.5	CONP	1	0
1	174.5	CONP	1	0
1	174.5	CONP	1	0
1	174.5	CONP	1	0
1	174.5	CONP	1	0
1	174.5	CONP	1	0
1	174.5	CONP	1	0
1	174.5	CONP	1	0
1	174.5	CONP	1	0
1	174.5	CONP	1	0
1	174.5	CONP	1	0
1	174.5	CONP	1	0
1	174.5	CONP	1	0
1	174.5	CONP	1	0
1	174.5	CONP	1	0
1	174.5	CONP	1	0
1	174.5	CONP	1	0
1	174.5	CONP	1	0
1	174.5	CONP	1	0
1	174.5	CONP	1	0
1	174.5	CONP	1	0
1	174.5	CONP	1	0
1	174.5	CONP	1	0
1	174.5	CONP	1	0
1	174.5	CONP	1	0
1	174.5	CONP	1	0
1	174.5	CONP	1	0
1	174.5	CONP	1	0
1	174.5	CONP	1	0
1	174.5	CONP	1	0
1	174.5	CONP	1	0
1	174.5	CONP	1	0
1	174.5	CONP	1	0
1	174.5	CONP	1	0
1	174.5	CONP	1	0
1	174.5	CONP	1	0
1	174.5	CONP	1	0
1	174.5	CONP	1	0
1	174.5	CONP	1	0
1	174.5	CONP	1	1
1	174.5	CONP	1	1
1	174.5	CONP	1	1
1	174.5	CONP	1	1
1	174.5	CONP	1	1
1	174.5	CONP	1	1
1	174.5	CONP	1	1
1	174.5	CONP	1	1
1	174.5	CONP	1	1
1	174.5	CONP	1	1
1	174.5	CONP	1	1
1	174.5	CONP	1	1
1	174.5	CONP	1	1
1	174.5	CONP	1	1
1	174.5	CONP	1	1
1	174.5	CONP	1	1
1	174.5	CONP	1	1
1	174.5	CONP	1	1
1	174.5	CONP	1	1
1	174.5	CONP	1	1
1	174.5	CONP	1	1
1	174.5	CONP	1	1
1	174.5	CONP	1	1
1	174.5	CONP	1	1
1	174.5	CONP	1	1
1	174.5	CONP	1	1
1	174.5	CONP	1	1
1	174.5	CONP	1	1
1	174.5	CONP	1	1
1	174.5	CONP	1	1
1	174.5	CONP	1	1
1	174.5	CONP	1	1
1	174.5	CONP	1	1
1	174.5	CONP	1	1
1	174.5	CONP	1	1
1	174.5	CONP	1	1
1	174.5	CONP	1	1
1	174.5	CONP	1	1
1	174.5	CONP	1	1
1	174.5	CONP	1	1
1	174.5	CONP	1	1
1	174.5	CONP	1	1
1	174.5	CONP	1	1
1	174.5	CONP	1	1
1	174.5	CONP	1	1
1	174.5	CONP	1	1
1	174.5	CONP	1	1
1	174.5	CONP	1	1
1	174.5	CONP	1	1
1	174.5	CONP	1	1
1	174.5	CONP	1	1
1	174.5	CONP	1	1
1	174.5	CONP	1	1
1	174.5	CONP	1	1
1	174.5	CONP	1	1
1	174.5	CONP	1	1
1	174.5	CONP	1	1
1	174.5	CONP	1	1
1	174.5	CONP	1	1
1	174.5	CONP	1	1
1	174.5	CONP	1	1
1	174.5	CONP	1	1
1	174.5	CONP	1	1
1	174.5	CONP	1	1
1	174.5	CONP	1	1
1	174.5	CONP	1	1
1	174.5	CONP	1	1
1	174.5	CONP	1	1
1	174.5	CONP	1	1
1	174.5	CONP	1	1
1	174.5	CONP	1	1
1	174.5	CONP	1	1
1	174.5	CONP	1	1
1	174.5	CONP	1	1
1	174.5	CONP	1	1
1	174.5	CONP	1	1
1	174.5	CONP	1	1
1	174.5	CONP	1	1
1	174.5	CONP	1	1
1	174.5	CONP	1	1
1	174.5	CONP	1	1
1	174.5	CONP	1	1
1	174.5	CONP	1	1
1	174.5	CONP	1	1
1	174.5	CONP	1	1
1	174.5	CONP	1	1
1	174.5	CONP	1	1
1	174.5	CONP	1	1
1	174.5	CONP	1	1
1	174.5	CONP	1	1
1	174.5	CONP	1	1
1	174.5	CONP	1	1
1	174.5	CONP	1	1
1	174.5	CONP	1	1
1	174.5	CONP	1	1
1	174.5	CONP	1	1
1	174.5	CONP	1	1
1	174.5	CONP	1	1
1	174.5	CONP	1	1
1	174.5	CONP	1	1
1	174.5	CONP	1	1
1	174.5	CONP	1	1
1	174.5	CONP	1	1
1	174.5	CONP	1	1
1	174.5	CONP	1	1
1	174.5	CONP	1	1
1	174.5	CONP	1	1
1	174.5	CONP	1	1
1	174.5	CONP	1	1
1	174.5	CONP	1	1
1	174.5	CONP	1	1
1	174.5	CONP	1	1
1	174.5	CONP	1	1
1	174.5	CONP	1	1
1	174.5	CONP	1	1
1	174.5	CONP	1	1
1	174.5	CONP	1	1
1	174.5	CONP	1	1
1	174.5	CONP	1	1
1	174.5	CONP	1	1
1	174.5	CONP	1	1
1	174.5	CONP	1	1
1	174.5	CONP	1	1
1	174.5	CONP	1	1
1	174.5	CONP	1	1
1	174.5	CONP	1	1
1	174.5	CONP	1	1
1	174.5	CONP	1	1
1	174.5	CONP	1	1
1	174.5	CONP	1	1
1	174.5	CONP	1	1
1	174.5	CONP	1	1
1	174.5	CONP	1	1
1	174.5	CONP	1	1
1	174.5	CONP	1	1
1	174.5	CONP	1	1
1	174.5	CONP	1	1
1	174.5	CONP	1	1
1	174.5	CONP	1	1
1	174.5	CONP	1	1
1	174.5	CONP	1	1
1	174.5	CONP	1	1
1	174.5	CONP	1	1
1	174.5	CONP	1	1
1	174.5	CONP	1	1
1	174.5	CONP	1	1
1	174.5	CONP	1	1
1	174.5	CONP	1	1
1	174.5	CONP	1	1
1	174.5	CONP	1	1
1	174.5	CONP	1	1
1	174.5	CONP	1	1
1	174.5	CONP	1	1
1	174.5	CONP	1	1
1	174.5	CONP	1	1
1	174.5	CONP	1	1
1	174.5	CONP	1	1
1	174.5	CONP	1	1
1	174.5	CONP	1	1
1	174.5	CONP	1	1
1	174.5	CONP	1	1
1	174.5	CONP	1	1
1	174.5	CONP	1	1
1	174.5	CONP	1	1
1	174.5	CONP	1	1
1	174.5	CONP	1	1
1	174.5	CONP	1	1
1	174.5	CONP	1	1
1	174.5	CONP	1	1
1	174.5	CONP	1	1
1	174.5	CONP	1	1
1	174.5	CONP	1	1
1	174.5	CONP	1	1
1	174.5	CONP	1	1
1	174.5	CONP	1	1
1	174.5	CONP	1	1
1	174.5	CONP	1	1
1	174.5	CONP	1	1
1	174.5	CONP	1	1
1	174.5	CONP	1	1
1	174.5	CONP	1	1
1	174.5	CONP	1	1
1	174.5	CONP	1	1
1	174.5	CONP	1	1
1	174.5	CONP	1	1
1	174.5	CONP	1	1
1	174.5	CONP	1	1
1	174.5	CONP	1	1
1	174.5	CONP	1	1
1	174.5	CONP	1	1
1	174.5	CONP	1	1
1	174.5	CONP	1	1
1	174.5	CONP	1	1
1	174.5	CONP	1	1
1	174.5	CONP	1	1
1	174.5	CONP	1	1
1	174.5	CONP	1	1
1	174.5	CONP	1	1
1	174.5	CONP	1	1
1	174.5	CONP	1	1
1	174.5	CONP	1	1
1	174.5	CONP	1	1
1	174.5	CONP	1	1
1	174.5	CONP	1	1
1	174.5	CONP	1	1
1	174.5	CONP	1	1
1	174.5	CONP	1	1
1	174.5	CONP	1	1
1	174.5	CONP	1	1
1	174.5	CONP	1	1
1	174.5	CONP	1	1
1	174.5	CONP	1	1
1	174.5	CONP	1	1
1	174.5	CONP	1	1
1	174.5	CONP	1	1
1	174.5	CONP	1	1
1	174.5	CONP	1	1
1	174.5	CONP	1	1
1	174.5	CONP	1	1
1	174.5	CONP	1	1
1	174.5	CONP	1	1
1	174.5	CONP	1	1
1	174.5	CONP	1	1
1	174.5	CONP	1	1
1	174.5	CONP	1	1
1	174.5	CONP	1	1
1	174.5	CONP	1	1
1	174.5	CONP	1	1
1	174.5	CONP	1	1
1	174.5	CONP	1	1
1	174.5	CONP	1	1
1	174.5	CONP	1	1
1	174.5	CONP	1	1
1	174.5	CONP	1	1
1	174.5	CONP	1	1
1	174.5	CONP	1	1
1	174.5	CONP	1	1
1	174.5	CONP	1	1
1	174.5	CONP	1	1
1	174.5	CONP	1	1
1	174.5	CONP	1	1
1	174.5	CONP	1	1
1	174.5	CONP	1	1
1	174.5	CONP	1	1
1	174.5	CONP	1	1
1	174.5	CONP	1	1
1	174.5	CONP	1	1
1	174.5	CONP	1	1
1	174.5	CONP	1	1
1	174.5	CONP	1	1
1	174.5	CONP	1	1
1	174.5	CONP	1	1
1	174.5	CONP	1	1
1	174.5	CONP	1	1
1	174.5	CONP	1	1
1	174.5	CONP	1	1
1	174.5	CONP	1	1
1	174.5	CONP	1	1
1	174.5	CONP	1	1
1	174.5	CONP	1	1
1	174.5	CONP	1	1
1	174.5	CONP	1	1
1	174.5	CONP	1	1
1	174.5	CONP	1	1
1	174.5	CONP	1	1
1	174.5	CONP	1	1
1	174.5	CONP	1	1
1	174.5	CONP	1	1
1	174.5	CONP	1	1
1	174.5	CONP	1	1
1	174.5	CONP	1	1
1	174.5	CONP	1	1
1	174.5	CONP	1	1
1	174.5	CONP	1	1
1	174.5	CONP	1	1
1	174.5	CONP	1	1
1	174.5	CONP	1	1
1	174.5	CONP	1	1
1	174.5	CONP	1	1
1	174.5	CONP	1	1
1	174.5	CONP	1	1
1	174.5	CONP	1	1
1	174.5	CONP	1	1
1	174.5	CONP	1	1
1	174.5	CONP	1	1
1	174.5	CONP	1	1
1	174.5	CONP	1	1
1	174.5	CONP	1	0
1	174.5	CONP	1	1
1	174.5	CONP	1	1
1	174.5	CONP	1	1
1	174.5	CONP	1	1
1	174.5	CONP	1	1
1	174.5	CONP	1	1
1	174.5	CONP	1	1
1	174.5	CONP	1	1
1	174.5	CONP	1	1
1	174.5	CONP	1	1
1	174.5	CONP	1	1
1	174.5	CONP	1	1
1	174.5	CONP	1	1
1	174.5	CONP	1	1
1	174.5	CONP	1	1
1	174.5	CONP	1	1
1	174.5	CONP	1	1
1	174.5	CONP	1	1
1	174.5	CONP	1	1
1	174.5	CONP	1	1
1	174.5	CONP	1	1
1	174.5	CONP	1	1
1	174.5	CONP	1	1
1	174.5	CONP	1	1
1	174.5	CONP	1	1
1	174.5	CONP	1	1
1	174.5	CONP	1	1
1	174.5	CONP	1	1
1	174.5	CONP	1	1
1	174.5	CONP	1	1
1	174.5	CONP	1	1
1	174.5	CONP	1	1
1	174.5	CONP	1	1
1	174.5	CONP	1	1
1	174.5	CONP	1	1
1	174.5	CONP	1	1
1	174.5	CONP	1	1
1	174.5	CONP	1	1
1	174.5	CONP	1	1
1	174.5	CONP	1	1
1	174.5	CONP	1	1
1	174.5	CONP	1	1
1	174.5	CONP	1	1
1	174.5	CONP	1	1
1	174.5	CONP	1	1
1	174.5	CONP	1	1
1	174.5	CONP	1	1
1	174.5	CONP	1	1
1	174.5	CONP	1	1
1	174.5	CONP	1	1
1	174.5	CONP	1	1
1	174.5	CONP	1	1
1	174.5	CONP	1	1
1	174.5	CONP	1	1
1	174.5	CONP	1	1
1	174.5	CONP	1	1
1	174.5	CONP	1	1
1	174.5	CONP	1	1
1	174.5	CONP	1	1
1	174.5	CONP	1	1
1	174.5	CONP	1	1
1	174.5	CONP	1	1
1	174.5	CONP	1	1
1	174.5	CONP	1	1
1	174.5	CONP	1	1
1	174.5	CONP	1	1
1	174.5	CONP	1	1
1	174.5	CONP	1	1
1	174.5	CONP	1	1
1	174.5	CONP	1	1
1	174.5	CONP	1	1
1	174.5	CONP	1	1
1	174.5	CONP	1	1
1	174.5	CONP	1	1
1	174.5	CONP	1	1
1	174.5	CONP	1	1
1	174.5	CONP	1	1
1	174.5	CONP	1	1
1	174.5	CONP	1	1
1	174.5	CONP	1	1
1	174.5	CONP	1	1
1	174.5	CONP	1	1
1	174.5	CONP	1	1
1	174.5	CONP	1	1
1	174.5	CONP	1	1
1	174.5	CONP	1	1
1	174.5	CONP	1	1
1	174.5	CONP	1	1
1	174.5	CONP	1	1
1	174.5	CONP	1	1
1	174.5	CONP	1	1
1	174.5	CONP	1	1
1	174.5	CONP	1	1
1	174.5	CONP	1	1
1	174.5	CONP	1	1
1	174.5	CONP	1	1
1	174.5	CONP	1	1
1	174.5	CONP	1	1
1	174.5	CONP	1	1
1	174.5	CONP	1	1
1	174.5	CONP	1	1
1	174.5	CONP	1	1
1	174.5	CONP	1	1
1	174.5	CONP	1	1
1	174.5	CONP	1	1
1	174.5	CONP	1	1
1	174.5	CONP	1	1
1	174.5	CONP	1	1
1	174.5	CONP	1	1
1	174.5	CONP	1	1
1	174.5	CONP	1	1
1	174.5	CONP	1	1
1	174.5	CONP	1	1
1	174.5	CONP	1	1
1	174.5	CONP	1	1
1	174.5	CONP	1	1
1	174.5	CONP	1	1
1	174.5	CONP	1	1
1	174.5	CONP	1	1
1	174.5	CONP	1	1
1	174.5	CONP	1	1
1	174.5	CONP	1	1
1	174.5	CONP	1	1
1	174.5	CONP	1	1
1	174.5	CONP	1	1
1	174.5	CONP	1	1
1	174.5	CONP	1	1
1	174.5	CONP	1	1
1	174.5	CONP	1	1
1	174.5	CONP	1	1
1	174.5	CONP	1	1
1	174.5	CONP	1	1
1	174.5	CONP	1	1
1	174.5	CONP	1	1
1	174.5	CONP	1	1
1	174.5	CONP	1	1
1	174.5	CONP	1	1
1	174.5	CONP	1	1
1	174.5	CONP	1	1
1	174.5	CONP	1	1
1	174.5	CONP	1	1
1	174.5	CONP	1	1
1	174.5	CONP	1	1
1	174.5	CONP	1	1
1	174.5	CONP	1	1
1	174.5	CONP	1	1
1	174.5	CONP	1	1
1	174.5	CONP	1	1
1	174.5	CONP	1	1
1	174.5	CONP	1	1
1	174.5	CONP	1	1
1	174.5	CONP	1	1
1	174.5	CONP	1	1
1	174.5	CONP	1	1
1	174.5	CONP	1	1
1	174.5	CONP	1	1
1	174.5	CONP	1	1
1	174.5	CONP	1	1
1	174.5	CONP	1	1
1	174.5	CONP	1	1
1	174.5	CONP	1	1
1	174.5	CONP	1	1
1	174.5	CONP	1	1
1	174.5	CONP	1	1
1	174.5	CONP	1	1
1	174.5	CONP	1	1
1	174.5	CONP	1	1
1	174.5	CONP	1	1
1	174.5	CONP	1	1
1	174.5	CONP	1	1
1	174.5	CONP	1	1
1	174.5	CONP	1	1
1	174.5	CONP	1	1
1	174.5	CONP	1	1
1	174.5	CONP	1	1
1	174.5	CONP	1	1
1	174.5	CONP	1	1
1	174.5	CONP	1	1
1	174.5	CONP	1	1
1	174.5	CONP	1	1
1	174.5	CONP	1	1
1	174.5	CONP	1	1
1	174.5	CONP	1	1
1	174.5	CONP	1	1
1	174.5	CONP	1	1
1	174.5	CONP	1	1
1	174.5	CONP	1	1
1	174.5	CONP	1	1
1	174.5	CONP	1	1
1	174.5	CONP	1	1
1	174.5	CONP	1	1
1	174.5	CONP	1	1
1	174.5	CONP	1	1
1	174.5	CONP	1	1
1	174.5	CONP	1	1
1	174.5	CONP	1	1
1	174.5	CONP	1	1
1	174.5	CONP	1	1
1	174.5	CONP	1	1
1	174.5	CONP	1	1
1	174.5	CONP	1	1
1	174.5	CONP	1	1
1	174.5	CONP	1	1
1	174.5	CONP	1	1
1	174.5	CONP	1	1
1	174.5	CONP	1	1
1	174.5	CONP	1	1
1	174.5	CONP	1	1
1	174.5	CONP	1	1
1	174.5	CONP	1	1
1	174.5	CONP	1	1
1	174.5	CONP	1	1
1	174.5	CONP	1	1
1	174.5	CONP	1	1
1	174.5	CONP	1	1
1	174.5	CONP	1	1
1	174.5	CONP	1	1
1	174.5	CONP	1	1
1	174.5	CONP	1	1
1	174.5	CONP	1	1
1	174.5	CONP	1	1
1	174.5	CONP	1	1
1	174.5	CONP	1	1
1	174.5	CONP	1	1
1	174.5	CONP	1	1
1	174.5	CONP	1	1
1	174.5	CONP	1	1
1	174.5	CONP	1	1
1	174.5	CONP	1	1
1	174.5	CONP	1	1
1	174.5	CONP	1	1
1	174.5	CONP	1	1
1	174.5	CONP	1	1
1	174.5	CONP	1	1
1	174.5	CONP	1	1
1	174.5	CONP	1	1
1	174.5	CONP	1	1
1	174.5	CONP	1	1
1	174.5	CONP	1	1
1	174.5	CONP	1	1
1	174.5	CONP	1	1
1	174.5	CONP	1	1
1	174.5	CONP	1	1
1	174.5	CONP	1	1
1	174.5	CONP	1	1
1	174.5	CONP	1	1
1	174.5	CONP	1	1
1	174.5	CONP	1	1
1	174.5	CONP	1	1
1	174.5	CONP	1	1
1	174.5	CONP	1	1
1	174.5	CONP	1	1
1	174.5	CONP	1	1
1	174.5	CONP	1	1
1	174.5	CONP	1	1
1	174.5	CONP	1	1
1	174.5	CONP	1	1
1	174.5	CONP	1	1
1	174.5	CONP	1	1
1	174.5	CONP	1	1
1	174.5	CONP	1	1
1	174.5	CONP	1	1
1	174.5	CONP	1	1
1	174.5	CONP	1	1
1	174.5	CONP	1	1
1	174.5	CONP	1	1
1	174.5	CONP	1	1
1	174.5	CONP	1	1
1	174.5	CONP	1	1
1	174.5	CONP	1	1
1	174.5	CONP	1	1
1	174.5	CONP	1	1
1	174.5	CONP	1	1
1	174.5	CONP	1	1
1	174.5	CONP	1	1
1	174.5	CONP	1	1
1	174.5	CONP	1	1
1	174.5	CONP	1	1
1	174.5	CONP	1	1
1	174.5	CONP	1	1
1	174.5	CONP	1	1
1	174.5	CONP	1	1
1	174.5	CONP	1	1
1	174.5	CONP	1	1
1	174.5	CONP	1	1
1	174.5	CONP	1	1
1	174.5	CONP	1	1
1	174.5	CONP	1	1
1	174.5	CONP	1	1
1	174.5	CONP	1	1
1	174.5	CONP	1	1
1	174.5	CONP	1	1
1	174.5	CONP	1	1
1	174.5	CONP	1	1
1	174.5	CONP	1	1
1	174.5	CONP	1	1
1	174.5	CONP	1	1
1	174.5	CONP	1	1
1	174.5	CONP	1	1
1	174.5	CONP	1	1
1	174.5	CONP	1	1
1	174.5	CONP	1	1
1	174.5	CONP	1	1
1	174.5	CONP	1	1
1	174.5	CONP	1	1
1	174.5	CONP	1	1
1	174.5	CONP	1	1
1	174.5	CONP	1	1
1	174.5	CONP	1	1
1	174.5	CONP	1	1
1	174.5	CONP	1	1
1	174.5	CONP	1	1
1	174.5	CONP	1	1
1	174.5	CONP	1	1
1	174.5	CONP	1	1
1	174.5	CONP	1	1
1	174.5	CONP	1	1
1	174.5	CONP	1	1
1	174.5	CONP	1	1
1	174.5	CONP	1	1
1	174.5	CONP	1	1
1	174.5	CONP	1	1
1	174.5	CONP	1	1
1	174.5	CONP	1	1
1	174.5	CONP	1	1
1	174.5	CONP	1	1
1	174.5	CONP	1	1
1	174.5	CONP	1	1
1	174.5	CONP	1	1
1	174.5	CONP	1	1
1	174.5	CONP	1	1
1	174.5	CONP	1	1
1	174.5	CONP	1	1
1	174.5	CONP	1	1
1	174.5	CONP	1	1
1	174.5	CONP	1	1
1	174.5	CONP	1	0
1	174.5	CONP	1	0
1	174.5	CONP	1	0
1	174.5	CONP	1	0
1	174.5	CONP	1	0
1	174.5	CONP	1	0
1	174.5	CONP	1	0
1	174.5	CONP	1	0
1	174.5	CONP	1	0
1	174.5	CONP	1	0
1	174.5	CONP	1	0
1	174.5	CONP	1	0
1	174.5	CONP	1	0
1	174.5	CONP	1	1
1	174.5	CONP	1	1
1	174.5	CONP	1	1
1	174.5	CONP	1	1
1	174.5	CONP	1	1
1	174.5	CONP	1	1
1	174.5	CONP	1	1
1	174.5	CONP	1	1
1	174.5	CONP	1	1
1	174.5	CONP	1	1
1	174.5	CONP	1	1
1	174.5	CONP	1	1
1	174.5	CONP	1	1
1	174.5	CONP	1	1
1	174.5	CONP	1	1
1	174.5	CONP	1	1
1	174.5	CONP	1	1
1	174.5	CONP	1	1
1	174.5	CONP	1	1
1	174.5	CONP	1	1
1	174.5	CONP	1	1
1	174.5	CONP	1	1
1	174.5	CONP	1	1
1	174.5	CONP	1	1
1	174.5	CONP	1	1
1	174.5	CONP	1	1
1	174.5	CONP	1	1
1	174.5	CONP	1	1
1	174.5	CONP	1	1
1	174.5	CONP	1	1
1	174.5	CONP	1	1
1	174.5	CONP	1	1
1	174.5	CONP	1	1
1	174.5	CONP	1	1
1	174.5	CONP	1	1
1	174.5	CONP	1	1
1	174.5	CONP	1	1
1	174.5	CONP	1	1
1	174.5	CONP	1	1
1	174.5	CONP	1	1
1	174.5	CONP	1	1
1	174.5	CONP	1	1
1	174.5	CONP	1	1
1	174.5	CONP	1	1
1	174.5	CONP	1	1
1	174.5	CONP	1	1
1	174.5	CONP	1	1
1	174.5	CONP	1	1
1	174.5	CONP	1	1
1	174.5	CONP	1	1
1	174.5	CONP	1	1
1	174.5	CONP	1	1
1	174.5	CONP	1	1
1	174.5	CONP	1	1
1	174.5	CONP	1	1
1	174.5	CONP	1	1
1	174.5	CONP	1	1
1	174.5	CONP	1	1
1	174.5	CONP	1	1
1	174.5	CONP	1	1
1	174.5	CONP	1	1
1	174.5	CONP	1	1
1	174.5	CONP	1	1
1	174.5	CONP	1	1
1	174.5	CONP	1	1
1	174.5	CONP	1	1
1	174.5	CONP	1	1
1	174.5	CONP	1	1
1	174.5	CONP	1	1
1	174.5	CONP	1	1
1	174.5	CONP	1	1
1	174.5	CONP	1	1
1	174.5	CONP	1	1
1	174.5	CONP	1	1
1	174.5	CONP	1	1
1	174.5	CONP	1	1
1	174.5	CONP	1	1
1	174.5	CONP	1	1
1	174.5	CONP	1	1
1	174.5	CONP	1	1
1	174.5	CONP	1	1
1	174.5	CONP	1	1
1	174.5	CONP	1	1
1	174.5	CONP	1	1
1	174.5	CONP	1	1
1	174.5	CONP	1	1
1	174.5	CONP	1	1
1	174.5	CONP	1	1
1	174.5	CONP	1	1
1	174.5	CONP	1	1
1	174.5	CONP	1	1
1	174.5	CONP	1	1
1	174.5	CONP	1	1
1	174.5	CONP	1	1
1	174.5	CONP	1	1
1	174.5	CONP	1	1
1	174.5	CONP	1	1
1	174.5	CONP	1	1
1	174.5	CONP	1	1
1	174.5	CONP	1	1
1	174.5	CONP	1	1
1	174.5	CONP	1	1
1	174.5	CONP	1	1
1	174.5	CONP	1	1
1	174.5	CONP	1	1
1	174.5	CONP	1	1
1	174.5	CONP	1	1
1	174.5	CONP	1	1
1	174.5	CONP	1	1
1	174.5	CONP	1	1
1	174.5	CONP	1	1
1	174.5	CONP	1	1
1	174.5	CONP	1	1
1	174.5	CONP	1	1
1	174.5	CONP	1	1
1	174.5	CONP	1	1
1	174.5	CONP	1	1
1	174.5	CONP	1	1
1	174.5	CONP	1	1
1	174.5	CONP	1	1
1	174.5	CONP	1	1
1	174.5	CONP	1	1
1	174.5	CONP	1	1
1	174.5	CONP	1	1
1	174.5	CONP	1	1
1	174.5	CONP	1	1
1	174.5	CONP	1	1
1	174.5	CONP	1	1
1	174.5	CONP	1	1
1	174.5	CONP	1	1
1	174.5	CONP	1	1
1	174.5	CONP	1	1
1	174.5	CONP	1	1
1	174.5	CONP	1	1
1	174.5	CONP	1	1
1	174.5	CONP	1	1
1	174.5	CONP	1	1
1	174.5	CONP	1	1
1	174.5	CONP	1	1
1	174.5	CONP	1	1
1	174.5	CONP	1	1
1	174.5	CONP	1	1
1	174.5	CONP	1	1
1	174.5	CONP	1	1
1	174.5	CONP	1	1
1	174.5	CONP	1	1
1	174.5	CONP	1	1
1	174.5	CONP	1	1
1	174.5	CONP	1	1
1	174.5	CONP	1	1
1	174.5	CONP	1	1
1	174.5	CONP	1	1
1	174.5	CONP	1	1
1	174.5	CONP	1	1
1	174.5	CONP	1	1
1	174.5	CONP	1	1
1	174.5	CONP	1	1
1	174.5	CONP	1	1
1	174.5	CONP	1	1
1	174.5	CONP	1	1
1	174.5	CONP	1	1
1	174.5	CONP	1	1
1	174.5	CONP	1	1
1	174.5	CONP	1	1
1	174.5	CONP	1	1
1	174.5	CONP	1	1
1	174.5	CONP	1	1
1	174.5	CONP	1	1
1	174.5	CONP	1	1
1	174.5	CONP	1	1
1	174.5	CONP	1	1
1	174.5	CONP	1	1
1	174.5	CONP	1	1
1	174.5	CONP	1	1
1	174.5	CONP	1	1
1	174.5	CONP	1	1
1	174.5	CONP	1	1
1	174.5	CONP	1	1
1	174.5	CONP	1	1
1	174.5	CONP	1	1
1	174.5	CONP	1	1
1	174.5	CONP	1	1
1	174.5	CONP	1	1
1	174.5	CONP	1	1
1	174.5	CONP	1	1
1	174.5	CONP	1	1
1	174.5	CONP	1	1
1	174.5	CONP	1	1
1	174.5	CONP	1	1
1	174.5	CONP	1	1
1	174.5	CONP	1	1
1	174.5	CONP	1	1
1	174.5	CONP	1	1
1	174.5	CONP	1	1
1	174.5	CONP	1	1
1	174.5	CONP	1	1
1	174.5	CONP	1	1
1	174.5	CONP	1	1
1	174.5	CONP	1	1
1	174.5	CONP	1	1
1	174.5	CONP	1	1
1	174.5	CONP	1	1
1	174.5	CONP	1	1
1	174.5	CONP	1	1
1	174.5	CONP	1	1
1	174.5	CONP	1	1
1	174.5	CONP	1	1
1	174.5	CONP	1	1
1	174.5	CONP	1	1
1	174.5	CONP	1	1
1	174.5	CONP	1	1
1	174.5	CONP	1	1
1	174.5	CONP	1	1
1	174.5	CONP	1	1
1	174.5	CONP	1	1
1	174.5	CONP	1	1
1	174.5	CONP	1	1
1	174.5	CONP	1	1
1	174.5	CONP	1	1
1	174.5	CONP	1	1
1	174.5	CONP	1	1
1	174.5	CONP	1	1
1	174.5	CONP	1	1
1	174.5	CONP	1	1
1	174.5	CONP	1	1
1	174.5	CONP	1	1
1	174.5	CONP	1	1
1	174.5	CONP	1	1
1	174.5	CONP	1	1
1	174.5	CONP	1	1
1	174.5	CONP	1	1
1	174.5	CONP	1	1
1	174.5	CONP	1	1
1	174.5	CONP	1	1
1	174.5	CONP	1	1
1	174.5	CONP	1	1
1	174.5	CONP	1	1
1	174.5	CONP	1	1
1	174.5	CONP	1	1
1	174.5	CONP	1	1
1	174.5	CONP	1	1
1	174.5	CONP	1	1
1	174.5	CONP	1	1
1	174.5	CONP	1	1
1	174.5	CONP	1	1
1	174.5	CONP	1	1
1	174.5	CONP	1	1
1	174.5	CONP	1	1
1	174.5	CONP	1	1
1	174.5	CONP	1	1
1	174.5	CONP	1	1
1	174.5	CONP	1	1
1	174.5	CONP	1	1
1	174.5	CONP	1	1
1	174.5	CONP	1	1
1	174.5	CONP	1	1
1	174.5	CONP	1	1
1	174.5	CONP	1	1
1	174.5	CONP	1	1
1	174.5	CONP	1	1
1	174.5	CONP	1	1
1	174.5	CONP	1	1
1	174.5	CONP	1	1
1	174.5	CONP	1	1
1	174.5	CONP	1	1
1	174.5	CONP	1	1
1	174.5	CONP	1	1
1	174.5	CONP	1	1
1	174.5	CONP	1	1
1	174.5	CONP	1	1
1	174.5	CONP	1	1
1	174.5	CONP	1	1
1	174.5	CONP	1	1
1	174.5	CONP	1	1
1	174.5	CONP	1	1
1	174.5	CONP	1	1
1	174.5	CONP	1	1
1	174.5	CONP	1	1
1	174.5	CONP	1	1
1	174.5	CONP	1	1
1	174.5	CONP	1	1
1	174.5	CONP	1	1
1	174.5	CONP	1	1
1	174.5	CONP	1	1
1	174.5	CONP	1	1
1	174.5	CONP	1	1
1	174.5	CONP	1	1
1	174.5	CONP	1	1
1	174.5	CONP	1	1
1	174.5	CONP	1	1
1	174.5	CONP	1	1
1	174.5	CONP	1	1
1	174.5	CONP	1	1
1	174.5	CONP	1	1
1	174.5	CONP	1	1
1	174.5	CONP	1	1
1	174.5	CONP	1	1
1	174.5	CONP	1	1
1	174.5	CONP	1	1
1	174.5	CONP	1	1
1	174.5	CONP	1	1
1	174.5	CONP	1	1
1	174.5	CONP	1	1
1	174.5	CONP	1	1
1	174.5	CONP	1	1
1	174.5	CONP	1	1
1	174.5	CONP	1	1
1	174.5	CONP	1	1
1	174.5	CONP	1	1
1	174.5	CONP	1	1
1	174.5	CONP	1	1
1	174.5	CONP	1	1
1	174.5	CONP	1	1
1	174.5	CONP	1	1
1	174.5	CONP	1	1
1	174.5	CONP	1	1
1	174.5	CONP	1	1
1	174.5	CONP	1	1
1	174.5	CONP	1	1
1	174.5	CONP	1	1
1	174.5	CONP	1	1
1	174.5	CONP	1	1
1	174.5	CONP	1	1
1	174.5	CONP	1	1
1	174.5	CONP	1	1
1	174.5	CONP	1	1
1	174.5	CONP	1	1
1	174.5	CONP	1	1
1	174.5	CONP	1	1
1	174.5	CONP	1	1
1	174.5	CONP	1	1
1	174.5	CONP	1	1
1	174.5	CONP	1	1
1	174.5	CONP	1	1
1	174.5	CONP	1	1
1	174.5	CONP	1	1
1	174.5	CONP	1	1
1	174.5	CONP	1	1
1	174.5	CONP	1	1
1	174.5	CONP	1	1
1	174.5	CONP	1	1
1	174.5	CONP	1	1
1	174.5	CONP	1	1
1	174.5	CONP	1	1
1	174.5	CONP	1	1
1	174.5	CONP	1	1
1	174.5	CONP	1	1
1	174.5	CONP	1	1
1	174.5	CONP	1	1
1	174.5	CONP	1	1
1	174.5	CONP	1	1
1	174.5	CONP	1	1
1	174.5	CONP	1	1
1	174.5	CONP	1	1
1	174.5	CONP	1	1
1	174.5	CONP	1	1
1	174.5	CONP	1	1
1	174.5	CONP	1	1
1	174.5	CONP	1	1
1	174.5	CONP	1	1
1	174.5	CONP	1	1
1	174.5	CONP	1	1
1	174.5	CONP	1	1
1	174.5	CONP	1	1
1	174.5	CONP	1	1
1	174.5	CONP	1	1
1	174.5	CONP	1	1
1	174.5	CONP	1	1
1	174.5	CONP	1	1
1	174.5	CONP	1	1
1	174.5	CONP	1	1
1	174.5	CONP	1	1
1	174.5	CONP	1	1
1	174.5	CONP	1	1
1	174.5	CONP	1	1
1	174.5	CONP	1	1
1	174.5	CONP	1	1
1	174.5	CONP	1	1
1	174.5	CONP	1	1
1	174.5	CONP	1	1
1	174.5	CONP	1	1
1	174.5	CONP	1	1
1	174.5	CONP	1	1
1	174.5	CONP	1	1
1	174.5	CONP	1	1
1	174.5	CONP	1	1
1	174.5	CONP	1	1
1	174.5	CONP	1	1
1	174.5	CONP	1	1
1	174.5	CONP	1	1
1	174.5	CONP	1	1
1	174.5	CONP	1	1
1	174.5	CONP	1	1
1	174.5	CONP	1	1
1	174.5	CONP	1	1
1	174.5	CONP	1	1
1	174.5	CONP	1	1
1	174.5	CONP	1	1
1	174.5	CONP	1	1
1	174.5	CONP	1	1
1	174.5	CONP	1	1
1	174.5	CONP	1	1
1	174.5	CONP	1	1
1	174.5	CONP	1	1
1	174.5	CONP	1	1
1	174.5	CONP	1	1
1	174.5	CONP	1	1
1	174.5	CONP	1	1
1	174.5	CONP	1	1
1	174.5	CONP	1	1
1	174.5	CONP	1	1
1	174.5	CONP	1	1
1	174.5	CONP	1	1
1	174.5	CONP	1	1
1	174.5	CONP	1	1
1	174.5	CONP	1	1
1	174.5	CONP	1	1
1	174.5	CONP	1	1
1	174.5	CONP	1	1
1	174.5	CONP	1	1
1	174.5	CONP	1	1
1	174.5	CONP	1	1
1	174.5	CONP	1	1
1	174.5	CONP	1	1
1	174.5	CONP	1	1
1	174.5	CONP	1	1
1	174.5	CONP	1	1
1	174.5	CONP	1	1
1	174.5	CONP	1	1
1	174.5	CONP	1	1
1	174.5	CONP	1	1
1	174.5	CONP	1	1
1	174.5	CONP	1	1
1	174.5	CONP	1	1
1	174.5	CONP	1	1
1	174.5	CONP	1	1
1	174.5	CONP	1	1
1	174.5	CONP	1	1
1	174.5	CONP	1	1
1	174.5	CONP	1	1
1	174.5	CONP	1	1
1	174.5	CONP	1	1
1	174.5	CONP	1	1
1	174.5	CONP	1	1
1	174.5	CONP	1	1
1	174.5	CONP	1	1
1	174.5	CONP	1	1
1	174.5	CONP	1	1
1	174.5	CONP	1	1
1	174.5	CONP	1	1
1	174.5	CONP	1	1
1	174.5	CONP	1	1
1	174.5	CONP	1	1
1	174.5	CONP	1	1
1	174.5	CONP	1	1
1	174.5	CONP	1	1
1	174.5	CONP	1	1
1	174.5	CONP	1	1
1	174.5	CONP	1	1
1	174.5	CONP	1	1
1	174.5	CONP	1	1
1	174.5	CONP	1	1
1	174.5	CONP	1	1
1	174.5	CONP	1	1
1	174.5	CONP	1	1
1	174.5	CONP	1	1
1	174.5	CONP	1	1
1	174.5	CONP	1	1
1	174.5	CONP	1	1
1	174.5	CONP	1	1
1	174.5	CONP	1	1
1	174.5	CONP	1	1
1	174.5	CONP	1	1
1	174.5	CONP	1	1
1	174.5	CONP	1	1
1	174.5	CONP	1	1
1	174.5	CONP	1	1
1	174.5	CONP	1	1
1	174.5	CONP	1	1
1	174.5	CONP	1	1
1	174.5	CONP	1	1
1	174.5	CONP	1	1
1	174.5	CONP	1	1
1	174.5	CONP	1	1
1	174.5	CONP	1	1
1	174.5	CONP	1	1
1	174.5	CONP	1	1
1	174.5	CONP	1	1
1	174.5	CONP	1	1
1	174.5	CONP	1	1
1	174.5	CONP	1	1
1	174.5	CONP	1	1
1	174.5	CONP	1	1
1	174.5	CONP	1	1
1	174.5	CONP	1	1
1	174.5	CONP	1	1
1	174.5	CONP	1	1
1	174.5	CONP	1	1
1	174.5	CONP	1	1
1	174.5	CONP	1	1
1	174.5	CONP	1	1
1	174.5	CONP	1	1
1	174.5	CONP	1	1
1	174.5	CONP	1	1
1	174.5	CONP	1	1
1	174.5	CONP	1	1
1	174.5	CONP	1	1
1	174.5	CONP	1	1
1	174.5	CONP	1	1
1	174.5	CONP	1	1
1	174.5	CONP	1	1
1	174.5	CONP	1	1
1	174.5	CONP	1	0
1	174.5	CONP	1	1
1	174.5	CONP	1	1
1	174.5	CONP	1	1
1	174.5	CONP	1	1
1	174.5	CONP	1	1
1	174.5	CONP	1	1
1	174.5	CONP	1	1
1	174.5	CONP	1	1
1	174.5	CONP	1	1
1	174.5	CONP	1	1
1	174.5	CONP	1	1
1	174.5	CONP	1	1
1	174.5	CONP	1	1
1	174.5	CONP	1	1
1	174.5	CONP	1	1
1	174.5	CONP	1	1
1	174.5	CONP	1	1
1	174.5	CONP	1	1
1	174.5	CONP	1	1
1	174.5	CONP	1	1
1	174.5	CONP	1	1
1	174.5	CONP	1	1
1	174.5	CONP	1	1
1	174.5	CONP	1	1
1	174.5	CONP	1	1
1	174.5	CONP	1	1
1	174.5	CONP	1	1
1	174.5	CONP	1	1
1	174.5	CONP	1	1
1	174.5	CONP	1	1
1	174.5	CONP	1	1
1	174.5	CONP	1	1
1	174.5	CONP	1	1
1	174.5	CONP	1	1
1	174.5	CONP	1	1
1	174.5	CONP	1	1
1	174.5	CONP	1	1
1	174.5	CONP	1	1
1	174.5	CONP	1	1
1	174.5	CONP	1	0
1	174.5	CONP	1	1
1	174.5	CONP	1	1
1	174.5	CONP	1	1
1	174.5	CONP	1	1
1	174.5	CONP	1	1
1	174.5	CONP	1	1
1	174.5	CONP	1	1
1	174.5	CONP	1	0
1	174.5	CONP	1	1
1	174.5	CONP	1	0
1	174.5	CONP	1	1
1	174.5	CONP	1	1
1	174.5	CONP	1	1
1	174.5	CONP	1	1
1	174.5	CONP	1	1
1	174.5	CONP	1	1
1	174.5	CONP	1	1
1	174.5	CONP	1	1
1	174.5	CONP	1	0
1	174.5	CONP	1	1
1	174.5	CONP	1	1
1	174.5	CONP	1	1
1	174.5	CONP	1	1
1	174.5	CONP	1	1
1	174.5	CONP	1	0
1	174.5	CONP	1	1
1	174.5	CONP	1	1
1	174.5	CONP	1	1
1	174.5	CONP	1	1
1	174.5	CONP	1	1
1	174.5	CONP	1	1
1	174.5	CONP	1	0
1	174.5	CONP	1	1
1	174.5	CONP	1	1
1	174.5	CONP	1	0
1	174.5	CONP	1	1
1	174.5	CONP	1	1
1	174.5	CONP	1	1
1	174.5	CONP	1	1
1	174.5	CONP	1	0
1	174.5	CONP	1	1
1	174.5	CONP	1	1
1	174.5	CONP	1	1
1	174.5	CONP	1	1
1	174.5	CONP	1	1
1	174.5	CONP	1	1
1	174.5	CONP	1	1
1	174.5	CONP	1	1
1	174.5	CONP	1	1
1	174.5	CONP	1	1
1	174.5	CONP	1	0
1	174.5	CONP	1	1
1	174.5	CONP	1	1
1	174.5	CONP	1	1
1	174.5	CONP	1	1
1	174.5	CONP	1	1
1	174.5	CONP	1	1
1	174.5	CONP	1	1
1	174.5	CONP	1	1
1	174.5	CONP	1	1
1	174.5	CONP	1	1
1	174.5	CONP	1	0
1	174.5	CONP	1	1
1	174.5	CONP	1	1
1	174.5	CONP	1	1
1	174.5	CONP	1	1
1	174.5	CONP	1	1
1	174.5	CONP	1	1
1	174.5	CONP	1	1
1	174.5	CONP	1	1
1	174.5	CONP	1	1
1	174.5	CONP	1	1
1	174.5	CONP	1	1
1	174.5	CONP	1	0
1	174.5	CONP	1	1
1	174.5	CONP	1	1
1	174.5	CONP	1	1
1	174.5	CONP	1	0
1	174.5	CONP	1	1
1	174.5	CONP	1	1
1	174.5	CONP	1	1
1	174.5	CONP	1	1
1	174.5	CONP	1	0
1	174.5	CONP	1	1
1	174.5	CONP	1	1
1	174.5	CONP	1	1
1	174.5	CONP	1	1
1	174.5	CONP	1	1
1	174.5	CONP	1	1
1	174.5	CONP	1	1
1	174.5	CONP	1	0
1	174.5	CONP	1	1
1	174.5	CONP	1	1
1	174.5	CONP	1	0
1	174.5	CONP	1	0
1	174.5	CONP	1	1
1	174.5	CONP	1	1
1	174.5	CONP	1	0
1	174.5	CONP	1	1
1	174.5	CONP	1	1
1	174.5	CONP	1	1
1	174.5	CONP	1	1
1	174.5	CONP	1	1
1	174.5	CONP	1	1
1	174.5	CONP	1	1
1	174.5	CONP	1	1
1	174.5	CONP	1	1
1	174.5	CONP	1	1
1	174.5	CONP	1	1
1	174.5	CONP	1	1
1	174.5	CONP	1	1
1	174.5	CONP	1	1
1	174.5	CONP	1	1
1	174.5	CONP	1	1
1	174.5	CONP	1	1
1	174.5	CONP	1	1
1	174.5	CONP	1	0
1	174.5	CONP	1	1
1	174.5	CONP	1	0
1	174.5	CONP	1	1
1	174.5	CONP	1	0
1	174.5	CONP	1	0
1	174.5	CONP	1	1
1	174.5	CONP	1	1
1	174.5	CONP	1	1
1	174.5	CONP	1	1
1	174.5	CONP	1	1
1	174.5	CONP	1	1
1	174.5	CONP	1	1
1	174.5	CONP	1	1
1	174.5	CONP	1	1
1	174.5	CONP	1	1
1	174.5	CONP	1	1
1	174.5	CONP	1	1
1	174.5	CONP	1	1
1	174.5	CONP	1	1
1	174.5	CONP	1	1
1	174.5	CONP	1	1
1	174.5	CONP	1	1
1	174.5	CONP	1	0
1	174.5	CONP	1	1
1	174.5	CONP	1	1
1	174.5	CONP	1	1
1	174.5	CONP	1	1
1	174.5	CONP	1	1
1	174.5	CONP	1	1
1	174.5	CONP	1	1
1	174.5	CONP	1	0
1	174.5	CONP	1	0
1	174.5	CONP	1	1
1	174.5	CONP	1	1
1	174.5	CONP	1	1
1	174.5	CONP	1	1
1	174.5	CONP	1	1
1	174.5	CONP	1	1
1	174.5	CONP	1	0
1	174.5	CONP	1	1
1	174.5	CONP	1	0
1	174.5	CONP	1	1
1	174.5	CONP	1	1
1	174.5	CONP	1	1
1	174.5	CONP	1	1
1	174.5	CONP	1	1
1	174.5	CONP	1	1
1	174.5	CONP	1	1
1	174.5	CONP	1	1
1	174.5	CONP	1	1
1	174.5	CONP	1	1
1	174.5	CONP	1	0
1	174.5	CONP	1	0
1	174.5	CONP	1	1
1	174.5	CONP	1	1
1	174.5	CONP	1	1
1	174.5	CONP	1	0
1	174.5	CONP	1	1
1	174.5	CONP	1	0
1	174.5	CONP	1	1
1	174.5	CONP	1	1
1	174.5	CONP	1	1
1	174.5	CONP	1	1
1	174.5	CONP	1	1
1	174.5	CONP	1	0
1	174.5	CONP	1	1
1	174.5	CONP	1	0
1	174.5	CONP	1	1
1	174.5	CONP	1	1
1	174.5	CONP	1	1
1	174.5	CONP	1	1
1	174.5	CONP	1	1
1	174.5	CONP	1	1
1	174.5	CONP	1	1
1	174.5	CONP	1	1
1	174.5	CONP	1	1
1	174.5	CONP	1	1
1	174.5	CONP	1	1
1	174.5	CONP	1	1
1	174.5	CONP	1	0
1	174.5	CONP	1	1
1	174.5	CONP	1	1
1	174.5	CONP	1	1
1	174.5	CONP	1	1
1	174.5	CONP	1	0
1	174.5	CONP	1	1
1	174.5	CONP	1	1
1	174.5	CONP	1	1
1	174.5	CONP	1	1
1	174.5	CONP	1	1
1	174.5	CONP	1	1
1	174.5	CONP	1	0
1	174.5	CONP	1	1
1	174.5	CONP	1	0
1	174.5	CONP	1	1
1	174.5	CONP	1	1
1	174.5	CONP	1	1
1	174.5	CONP	1	1
1	174.5	CONP	1	1
1	174.5	CONP	1	1
1	174.5	CONP	1	1
1	174.5	CONP	1	1
1	174.5	CONP	1	1
1	174.5	CONP	1	1
1	174.5	CONP	1	1
1	174.5	CONP	1	1
1	174.5	CONP	1	1
1	174.5	CONP	1	1
1	174.5	CONP	1	0
1	174.5	CONP	1	1
1	174.5	CONP	1	1
1	174.5	CONP	1	1
1	174.5	CONP	1	1
1	174.5	CONP	1	1
1	174.5	CONP	1	1
1	174.5	CONP	1	1
1	174.5	CONP	1	1
1	174.5	CONP	1	1
1	174.5	CONP	1	1
1	174.5	CONP	1	0
1	174.5	CONP	1	1
1	174.5	CONP	1	1
1	174.5	CONP	1	1
1	174.5	CONP	1	1
1	174.5	CONP	1	1
1	174.5	CONP	1	0
1	174.5	CONP	1	1
1	174.5	CONP	1	1
1	174.5	CONP	1	1
1	174.5	CONP	1	1
1	174.5	CONP	1	1
1	174.5	CONP	1	1
1	174.5	CONP	1	1
1	174.5	CONP	1	1
1	174.5	CONP	1	1
1	174.5	CONP	1	1
1	174.5	CONP	1	1
1	174.5	CONP	1	1
1	174.5	CONP	1	1
1	174.5	CONP	1	1
1	174.5	CONP	1	1
1	174.5	CONP	1	1
1	174.5	CONP	1	1
1	174.5	CONP	1	0
1	174.5	CONP	1	1
1	174.5	CONP	1	1
1	174.5	CONP	1	1
1	174.5	CONP	1	1
1	174.5	CONP	1	1
1	174.5	CONP	1	1
1	174.5	CONP	1	1
1	174.5	CONP	1	0
1	174.5	CONP	1	1
1	174.5	CONP	1	1
1	174.5	CONP	1	1
1	174.5	CONP	1	1
1	174.5	CONP	1	1
1	174.5	CONP	1	1
1	174.5	CONP	1	1
1	174.5	CONP	1	1
1	174.5	CONP	1	1
1	174.5	CONP	1	1
1	174.5	CONP	1	0
1	174.5	CONP	1	1
1	174.5	CONP	1	1
1	174.5	CONP	1	1
1	174.5	CONP	1	1
1	174.5	CONP	1	1
1	174.5	CONP	1	1
1	174.5	CONP	1	1
1	174.5	CONP	1	1
1	174.5	CONP	1	0
1	174.5	CONP	1	0
1	174.5	CONP	1	1
1	174.5	CONP	1	1
1	174.5	CONP	1	1
1	174.5	CONP	1	1
1	174.5	CONP	1	1
1	174.5	CONP	1	1
1	174.5	CONP	1	1
1	174.5	CONP	1	1
1	174.5	CONP	1	1
1	174.5	CONP	1	1
1	174.5	CONP	1	1
1	174.5	CONP	1	0
1	174.5	CONP	1	1
1	174.5	CONP	1	1
1	174.5	CONP	1	1
1	174.5	CONP	1	1
1	174.5	CONP	1	1
1	174.5	CONP	1	1
1	174.5	CONP	1	1
1	174.5	CONP	1	1
1	174.5	CONP	1	1
1	174.5	CONP	1	1
1	174.5	CONP	1	1
1	174.5	CONP	1	1
1	174.5	CONP	1	0
1	174.5	CONP	1	1
1	174.5	CONP	1	1
1	174.5	CONP	1	1
1	174.5	CONP	1	1
1	174.5	CONP	1	0
1	174.5	CONP	1	1
1	174.5	CONP	1	1
1	174.5	CONP	1	1
1	174.5	CONP	1	1
1	174.5	CONP	1	0
1	174.5	CONP	1	1
1	174.5	CONP	1	1
1	174.5	CONP	1	1
1	174.5	CONP	1	1
1	174.5	CONP	1	1
[truncated: 962,135+ more rows]

## Sheet: Behaviour - walk
CALF NUMBER	WEIGHT	TREATMENT	DAY	TIMEPOINT	DURATION (S)
1	232	CONN	1	1	103.5
2	210	CONP	1	1	74.61
3	271	TA	1	1	80.25
4	122.5	CONP	1	1	85.95
5	275	BM	1	1	212.04
6	150	BMTA	1	1	125.69
7	282	CONP	1	1	23.92
8	203	CONN	1	1	127.12
9	197	TA	1	1	118.32
10	155.5	CONP	1	1	148.112
11	160.5	BM	1	1	132.83
12	235	BMTA	1	1	64.3964
13	111	CONN	1	1	85.2835
14	165	CONN	1	1	73.5721
15	230	TA	1	1	22.9892
16	269	BM	1	1	19.1854
17	164	TA	1	1	168.398
18	195	BM	1	1	46.6123
19	216	BMTA	1	1	93.1579
20	157	BMTA	1	1	48.5475
1	232	CONN	1	2	20.79
2	210	CONP	1	2	42.37
3	271	TA	1	2	77.54
4	122.5	CONP	1	2	22.26
5	275	BM	1	2	47.08
6	150	BMTA	1	2	0
7	282	CONP	1	2	25.26
8	203	CONN	1	2	28.79
9	197	TA	1	2	5.15
10	155.5	CONP	1	2	53.0845
11	160.5	BM	1	2	36.5691
12	235	BMTA	1	2	41.5073
13	111	CONN	1	2	38.8047
14	165	CONN	1	2	106.204
15	230	TA	1	2	31.5642
16	269	BM	1	2	27.8272
17	164	TA	1	2	32.4985
18	195	BM	1	2	35.2345
19	216	BMTA	1	2	68.3336
20	157	BMTA	1	2	11.9784
1	232	CONN	1	3	0.763562
2	210	CONP	1	3	0
3	271	TA	1	3	42.2775
4	122.5	CONP	1	3	23.39
5	275	BM	1	3	60.63
6	150	BMTA	1	3	13.75
7	282	CONP	1	3	0
8	203	CONN	1	3	66.33
9	197	TA	1	3	18.0848
10	155.5	CONP	1	3	0
11	160.5	BM	1	3	16.316
12	235	BMTA	1	3	0
13	111	CONN	1	3	*
14	165	CONN	1	3	2.96957
15	230	TA	1	3	14.681
16	269	BM	1	3	0
17	164	TA	1	3	4.53778
18	195	BM	1	3	25.1579
19	216	BMTA	1	3	15.2816
20	157	BMTA	1	3	67.1991
1	232	CONN	1	4	1.83513
2	210	CONP	1	4	0
3	271	TA	1	4	29.6241
4	122.5	CONP	1	4	41.27
5	275	BM	1	4	6.07
6	150	BMTA	1	4	0
7	282	CONP	1	4	15.42
8	203	CONN	1	4	43.41
9	197	TA	1	4	10.6148
10	155.5	CONP	1	4	33.7664
11	160.5	BM	1	4	0
12	235	BMTA	1	4	41.207
13	111	CONN	1	4	28.3611
14	165	CONN	1	4	37.3032
15	230	TA	1	4	0
16	269	BM	1	4	5.23846
17	164	TA	1	4	46.7458
18	195	BM	1	4	0
19	216	BMTA	1	4	19.0186
20	157	BMTA	1	4	25.4248
1	232	CONN	1	5	20.6862
2	210	CONP	1	5	46.55
3	271	TA	1	5	60.43
4	122.5	CONP	1	5	4.97
5	275	BM	1	5	26.53
6	150	BMTA	1	5	12.78
7	282	CONP	1	5	0
8	203	CONN	1	5	48.6119
9	197	TA	1	5	4.17
10	155.5	CONP	1	5	0
11	160.5	BM	1	5	29.4622
12	235	BMTA	1	5	39.3719
13	111	CONN	1	5	8.07457
14	165	CONN	1	5	10.9774
15	230	TA	1	5	0
16	269	BM	1	5	5.0049
17	164	TA	1	5	45.4111
18	195	BM	1	5	42.3748
19	216	BMTA	1	5	23.4229
20	157	BMTA	1	5	63.8959
1	232	CONN	1	6	25.8921
2	210	CONP	1	6	0
3	271	TA	1	6	15.52
4	122.5	CONP	1	6	37.64
5	275	BM	1	6	21.02
6	150	BMTA	1	6	4.34
7	282	CONP	1	6	26.53
8	203	CONN	1	6	45.78
9	197	TA	1	6	*
10	155.5	CONP	1	6	36.3356
11	160.5	BM	1	6	21.9548
12	235	BMTA	1	6	47.1462
13	111	CONN	1	6	0
14	165	CONN	1	6	8.84199
15	230	TA	1	6	2.10206
16	269	BM	1	6	0
17	164	TA	1	6	37.103
18	195	BM	1	6	5.105
19	216	BMTA	1	6	72.8046
20	157	BMTA	1	6	91.256
21	150	CONN	2	1	89.4209
22	234	CONP	2	1	0
23	218	CONP	2	1	0
24	232	BM	2	1	96.6279
25	187.5	BMTA	2	1	169.299
26	195.5	CONN	2	1	67.8998
27	207	TA	2	1	75.0735
28	181.5	BM	2	1	35.9018
29	191	BMTA	2	1	63.362
30	180.5	CONN	2	1	62.3944
31	242	TA	2	1	29.9293
32	260	BM	2	1	59.1246
33	191	BMTA	2	1	*
34	211	CONN	2	1	0
35	228	TA	2	1	88.2864
36	192	BM	2	1	91.7899
37	226	BM	2	1	87.7192
38	212	BMTA	2	1	57.3895
39	267	CONP	2	1	5.67222
40	268	TA	2	1	92.3571
21	150	CONN	2	2	51.0166
22	234	CONP	2	2	0
23	218	CONP	2	2	30.4965
24	232	BM	2	2	125.456
25	187.5	BMTA	2	2	119.417
26	195.5	CONN	2	2	36.9362
27	207	TA	2	2	68.9675
28	181.5	BM	2	2	0
29	191	BMTA	2	2	45.1442
30	180.5	CONN	2	2	0
31	242	TA	2	2	20.6536
32	260	BM	2	2	25.4916
33	191	BMTA	2	2	*
34	211	CONN	2	2	24.6908
35	228	TA	2	2	16.0157
36	192	BM	2	2	61.8606
37	226	BM	2	2	27.627
38	212	BMTA	2	2	26.3925
39	267	CONP	2	2	38.7713
40	268	TA	2	2	0
21	150	CONN	2	3	35.2011
22	234	CONP	2	3	13.4465
23	218	CONP	2	3	37.0029
24	232	BM	2	3	75.3071
25	187.5	BMTA	2	3	60.6928
26	195.5	CONN	2	3	45.7114
27	207	TA	2	3	13.4465
28	181.5	BM	2	3	23.523
29	191	BMTA	2	3	4.17075
30	180.5	CONN	2	3	2.80274
31	242	TA	2	3	80.2786
32	260	BM	2	3	58.524
33	191	BMTA	2	3	20.1864
34	211	CONN	2	3	36.2021
35	228	TA	2	3	33.6663
36	192	BM	2	3	50.416
37	226	BM	2	3	24.9578
38	212	BMTA	2	3	24.2904
39	267	CONP	2	3	13.2797
40	268	TA	2	3	25.9921
21	150	CONN	2	4	2.36899
22	234	CONP	2	4	0
23	218	CONP	2	4	0
24	232	BM	2	4	22.6889
25	187.5	BMTA	2	4	111.976
26	195.5	CONN	2	4	14.7144
27	207	TA	2	4	36.469
28	181.5	BM	2	4	26.526
29	191	BMTA	2	4	18.3847
30	180.5	CONN	2	4	41.8743
31	242	TA	2	4	3.26987
32	260	BM	2	4	23.6565
33	191	BMTA	2	4	12.946
34	211	CONN	2	4	22.1884
35	228	TA	2	4	49.7821
36	192	BM	2	4	21.3209
37	226	BM	2	4	11.9784
38	212	BMTA	2	4	0
39	267	CONP	2	4	0
40	268	TA	2	4	13.9136
21	150	CONN	2	5	13.6467
22	234	CONP	2	5	0
23	218	CONP	2	5	16.6162
24	232	BM	2	5	42.2748
25	187.5	BMTA	2	5	78.677
26	195.5	CONN	2	5	13.0127
27	207	TA	2	5	0
28	181.5	BM	2	5	41.6741
29	191	BMTA	2	5	11.7115
30	180.5	CONN	2	5	21.6879
31	242	TA	2	5	5.40529
32	260	BM	2	5	33.6329
33	191	BMTA	2	5	25.7252
34	211	CONN	2	5	42.3415
35	228	TA	2	5	0
36	192	BM	2	5	47.6133
37	226	BM	2	5	34.0333
38	212	BMTA	2	5	26.1589
39	267	CONP	2	5	0
40	268	TA	2	5	101.099
21	150	CONN	2	6	0
22	234	CONP	2	6	0
23	218	CONP	2	6	2.23552
24	232	BM	2	6	26.2924
25	187.5	BMTA	2	6	73.3051
26	195.5	CONN	2	6	1.16781
27	207	TA	2	6	26.8596
28	181.5	BM	2	6	60.8262
29	191	BMTA	2	6	0
30	180.5	CONN	2	6	2.80274
31	242	TA	2	6	4.43768
32	260	BM	2	6	3.67026
33	191	BMTA	2	6	15.0481
34	211	CONN	2	6	11.1442
35	228	TA	2	6	*
36	192	BM	2	6	0
37	226	BM	2	6	0
38	212	BMTA	2	6	25.3582
39	267	CONP	2	6	0
40	268	TA	2	6	0
41	288	CONN	3	1	131.929
42	234.5	TA	3	1	31.6643
43	189.5	BMTA	3	1	155.853
44	180	CONP	3	1	38.471
45	230	CONN	3	1	91.1559
46	144.5	CONP	3	1	0
47	165.5	TA	3	1	40.1727
48	206	CONP	3	1	95.3267
49	235	BM	3	1	63.8959
50	274	BMTA	3	1	256.451
51	201	TA	3	1	41.6741
52	169.5	CONP	3	1	0
53	190.5	CONN	3	1	172.235
54	174.5	CONP	3	1	43.8429
55	227	BM	3	1	50.5161
56	198	BMTA	3	1	148.212
57	183	CONN	3	1	69.4013
58	189	TA	3	1	51.3503
59	233	BM	3	1	42.0412
60	226	BMTA	3	1	0
41	288	CONN	3	2	49.7821
42	234.5	TA	3	2	8.04121
43	189.5	BMTA	3	2	38.9048
44	180	CONP	3	2	26.259
45	230	CONN	3	2	30.1629
46	144.5	CONP	3	2	7.97447
47	165.5	TA	3	2	15.8488
48	206	CONP	3	2	41.8076
49	235	BM	3	2	12.0785
50	274	BMTA	3	2	120.118
51	201	TA	3	2	13.4465
52	169.5	CONP	3	2	8.00784
53	190.5	CONN	3	2	90.5553
54	174.5	CONP	3	2	29.9627
55	227	BM	3	2	36.8361
56	198	BMTA	3	2	103.668
57	183	CONN	3	2	69.4346
58	189	TA	3	2	44.5102
59	233	BM	3	2	13.9136
60	226	BMTA	3	2	0
41	288	CONN	3	3	3.03631
42	234.5	TA	3	3	29.2953
43	189.5	BMTA	3	3	2.13542
44	180	CONP	3	3	5.0049
45	230	CONN	3	3	2.80274
46	144.5	CONP	3	3	0
47	165.5	TA	3	3	6.73993
48	206	CONP	3	3	10.7105
49	235	BM	3	3	15.7821
50	274	BMTA	3	3	24.7242
51	201	TA	3	3	0
52	169.5	CONP	3	3	14.5476
53	190.5	CONN	3	3	109.841
54	174.5	CONP	3	3	0
55	227	BM	3	3	10.8773
56	198	BMTA	3	3	103.201
57	183	CONN	3	3	33.9332
58	189	TA	3	3	18.9519
59	233	BM	3	3	0
60	226	BMTA	3	3	0
41	288	CONN	3	4	92.8576
42	234.5	TA	3	4	22.789
43	189.5	BMTA	3	4	136.634
44	180	CONP	3	4	15.5819
45	230	CONN	3	4	73.6054
46	144.5	CONP	3	4	26.9597
47	165.5	TA	3	4	17.317
48	206	CONP	3	4	89.6878
49	235	BM	3	4	17.9509
50	274	BMTA	3	4	114.445
51	201	TA	3	4	16.5162
52	169.5	CONP	3	4	0
53	190.5	CONN	3	4	156.854
54	174.5	CONP	3	4	64.8969
55	227	BM	3	4	39.1383
56	198	BMTA	3	4	142.94
57	183	CONN	3	4	36.7693
58	189	TA	3	4	17.2169
59	233	BM	3	4	9.47594
60	226	BMTA	3	4	14.3474
41	288	CONN	3	5	14.1806
42	234.5	TA	3	5	29.0284
43	189.5	BMTA	3	5	89.254
44	180	CONP	3	5	4.8047
45	230	CONN	3	5	53.152
46	144.5	CONP	3	5	37.7036
47	165.5	TA	3	5	5.105
48	206	CONP	3	5	27.3601
49	235	BM	3	5	16.1491
50	274	BMTA	3	5	21.9882
51	201	TA	3	5	21.0539
52	169.5	CONP	3	5	43.5093
53	190.5	CONN	3	5	91.9901
54	174.5	CONP	3	5	33.5662
55	227	BM	3	5	12.9794
56	198	BMTA	3	5	70.7026
57	183	CONN	3	5	39.5053
58	189	TA	3	5	17.3837
59	233	BM	3	5	0
60	226	BMTA	3	5	26.1923
41	288	CONN	3	6	112.644
42	234.5	TA	3	6	38.5711
43	189.5	BMTA	3	6	63.8292
44	180	CONP	3	6	31.5976
45	230	CONN	3	6	47.3797
46	144.5	CONP	3	6	12.8459
47	165.5	TA	3	6	5.73895
48	206	CONP	3	6	63.8292
49	235	BM	3	6	*
50	274	BMTA	3	6	25.4916
51	201	TA	3	6	25.6918
52	169.5	CONP	3	6	22.9558
53	190.5	CONN	3	6	95.6937
54	174.5	CONP	3	6	*
55	227	BM	3	6	34.3336
56	198	BMTA	3	6	74.6731
57	183	CONN	3	6	26.5593
58	189	TA	3	6	20.0196
59	233	BM	3	6	37.3366
60	226	BMTA	3	6	21.3209

## Sheet: Behaviour - stand
CALF NUMBER	WEIGHT	TREATMENT	DAY	TIMEPOINT	DURATION (S)
1	232	CONN	1	1	161.858
2	210	CONP	1	1	235.531
3	271	TA	1	1	217.313
4	122.5	CONP	1	1	234.463
5	275	BM	1	1	82.2472
6	150	BMTA	1	1	174.504
7	282	CONP	1	1	276.07
8	203	CONN	1	1	173.103
9	197	TA	1	1	178.408
10	155.5	CONP	1	1	149.98
11	160.5	BM	1	1	149.113
12	235	BMTA	1	1	1.6683
13	111	CONN	1	1	208.471
14	165	CONN	1	1	211.574
15	230	TA	1	1	282.143
16	269	BM	1	1	292.32
17	164	TA	1	1	93.1579
18	195	BM	1	1	237.099
19	216	BMTA	1	1	195.491
20	157	BMTA	1	1	115.013
1	232	CONN	1	2	303.03
2	210	CONP	1	2	311.16
3	271	TA	1	2	783.601
4	122.5	CONP	1	2	279.24
5	275	BM	1	2	275.37
6	150	BMTA	1	2	298.062
7	282	CONP	1	2	277.638
8	203	CONN	1	2	266.561
9	197	TA	1	2	246.975
10	155.5	CONP	1	2	272.734
11	160.5	BM	1	2	263.958
12	235	BMTA	1	2	195.325
13	111	CONN	1	2	287.615
14	165	CONN	1	2	109.607
15	230	TA	1	2	281.743
16	269	BM	1	2	290.151
17	164	TA	1	2	134.565
18	195	BM	1	2	262.457
19	216	BMTA	1	2	231.927
20	157	BMTA	1	2	331.725
1	232	CONN	1	3	319.78
2	210	CONP	1	3	304.098
3	271	TA	1	3	214.21
4	122.5	CONP	1	3	280.775
5	275	BM	1	3	250.745
6	150	BMTA	1	3	281.342
7	282	CONP	1	3	723.642
8	203	CONN	1	3	232.928
9	197	TA	1	3	190.286
10	155.5	CONP	1	3	303.631
11	160.5	BM	1	3	282.877
12	235	BMTA	1	3	294.822
13	111	CONN	1	3	*
14	165	CONN	1	3	298.259
15	230	TA	1	3	226.155
16	269	BM	1	3	303.931
17	164	TA	1	3	294.822
18	195	BM	1	3	280.408
19	216	BMTA	1	3	276.371
20	157	BMTA	1	3	231.694
1	232	CONN	1	4	300.261
2	210	CONP	1	4	0
3	271	TA	1	4	271.232
4	122.5	CONP	1	4	259.054
5	275	BM	1	4	295.923
6	150	BMTA	1	4	303.197
7	282	CONP	1	4	288.849
8	203	CONN	1	4	157.921
9	197	TA	1	4	74.7065
10	155.5	CONP	1	4	182.912
11	160.5	BM	1	4	0
12	235	BMTA	1	4	265.593
13	111	CONN	1	4	145.809
14	165	CONN	1	4	192.922
15	230	TA	1	4	0
16	269	BM	1	4	97.0283
17	164	TA	1	4	253.582
18	195	BM	1	4	0
19	216	BMTA	1	4	283.845
20	157	BMTA	1	4	280.742
1	232	CONN	1	5	281.776
2	210	CONP	1	5	256.017
3	271	TA	1	5	241.804
4	122.5	CONP	1	5	298.092
5	275	BM	1	5	278.006
6	150	BMTA	1	5	287.615
7	282	CONP	1	5	300.794
8	203	CONN	1	5	240.769
9	197	TA	1	5	300.194
10	155.5	CONP	1	5	300.461
11	160.5	BM	1	5	273.034
12	235	BMTA	1	5	263.958
13	111	CONN	1	5	293.087
14	165	CONN	1	5	290.218
15	230	TA	1	5	301.061
16	269	BM	1	5	296.624
17	164	TA	1	5	244.707
18	195	BM	1	5	257.786
19	216	BMTA	1	5	277.972
20	157	BMTA	1	5	233.395
1	232	CONN	1	6	274.802
2	210	CONP	1	6	21.0206
3	271	TA	1	6	42.4082
4	122.5	CONP	1	6	263.525
5	275	BM	1	6	279.674
6	150	BMTA	1	6	294.822
7	282	CONP	1	6	274.236
8	203	CONN	1	6	255.584
9	197	TA	1	6	*
10	155.5	CONP	1	6	263.291
11	160.5	BM	1	6	23.3228
12	235	BMTA	1	6	253.849
13	111	CONN	1	6	299.426
14	165	CONN	1	6	291.185
15	230	TA	1	6	298.86
16	269	BM	1	6	301.128
17	164	TA	1	6	264.792
18	195	BM	1	6	294.922
19	216	BMTA	1	6	229.158
20	157	BMTA	1	6	206.602
21	150	CONN	2	1	191.721
22	234	CONP	2	1	300.161
23	218	CONP	2	1	300.294
24	232	BM	2	1	187.15
25	187.5	BMTA	2	1	131.629
26	195.5	CONN	2	1	233.93
27	207	TA	2	1	226.388
28	181.5	BM	2	1	264.392
29	191	BMTA	2	1	239.067
30	180.5	CONN	2	1	233.362
31	242	TA	2	1	270.431
32	260	BM	2	1	241.703
33	191	BMTA	2	1	*
34	211	CONN	2	1	299.326
35	228	TA	2	1	211.574
36	192	BM	2	1	210.64
37	226	BM	2	1	215.144
38	212	BMTA	2	1	242.571
39	267	CONP	2	1	295.356
40	268	TA	2	1	208.371
21	150	CONN	2	2	251.346
22	234	CONP	2	2	300.227
23	218	CONP	2	2	269.697
24	232	BM	2	2	175.739
25	187.5	BMTA	2	2	180.777
26	195.5	CONN	2	2	263.691
27	207	TA	2	2	232.461
28	181.5	BM	2	2	0
29	191	BMTA	2	2	255.75
30	180.5	CONN	2	2	0
31	242	TA	2	2	279.941
32	260	BM	2	2	280.475
33	191	BMTA	2	2	*
34	211	CONN	2	2	276.638
35	228	TA	2	2	289.15
36	192	BM	2	2	238.834
37	226	BM	2	2	273.468
38	212	BMTA	2	2	273.267
39	267	CONP	2	2	261.823
40	268	TA	2	2	300.961
21	150	CONN	2	3	73.3719
22	234	CONP	2	3	286.781
23	218	CONP	2	3	264.292
24	232	BM	2	3	219.048
25	187.5	BMTA	2	3	238.834
26	195.5	CONN	2	3	254.416
27	207	TA	2	3	287.048
28	181.5	BM	2	3	278.272
29	191	BMTA	2	3	297.091
30	180.5	CONN	2	3	296.757
31	242	TA	2	3	230.626
32	260	BM	2	3	242.904
33	191	BMTA	2	3	264.859
34	211	CONN	2	3	264.959
35	228	TA	2	3	108.239
36	192	BM	2	3	249.778
37	226	BM	2	3	275.47
38	212	BMTA	2	3	277.472
39	267	CONP	2	3	287.214
40	268	TA	2	3	274.736
21	150	CONN	2	4	299.393
22	234	CONP	2	4	300.528
23	218	CONP	2	4	301.529
24	232	BM	2	4	277.805
25	187.5	BMTA	2	4	188.718
26	195.5	CONN	2	4	285.112
27	207	TA	2	4	264.025
28	181.5	BM	2	4	274.202
29	191	BMTA	2	4	282.21
30	180.5	CONN	2	4	259.087
31	242	TA	2	4	298.759
32	260	BM	2	4	276.904
33	191	BMTA	2	4	288.382
34	211	CONN	2	4	278.373
35	228	TA	2	4	250.912
36	192	BM	2	4	307.801
37	226	BM	2	4	289.617
38	212	BMTA	2	4	304.031
39	267	CONP	2	4	299.994
40	268	TA	2	4	286.18
21	150	CONN	2	5	77.0755
22	234	CONP	2	5	0
23	218	CONP	2	5	281.843
24	232	BM	2	5	254.015
25	187.5	BMTA	2	5	221.049
26	195.5	CONN	2	5	89.521
27	207	TA	2	5	300.127
28	181.5	BM	2	5	155.285
29	191	BMTA	2	5	289.517
30	180.5	CONN	2	5	279.807
31	242	TA	2	5	297.324
32	260	BM	2	5	266.428
33	191	BMTA	2	5	86.9852
34	211	CONN	2	5	256.618
35	228	TA	2	5	298.893
36	192	BM	2	5	252.981
37	226	BM	2	5	269.797
38	212	BMTA	2	5	274.669
39	267	CONP	2	5	0
40	268	TA	2	5	174.137
21	150	CONN	2	6	300.361
22	234	CONP	2	6	299.66
23	218	CONP	2	6	298.859
24	232	BM	2	6	274.502
25	187.5	BMTA	2	6	214.443
26	195.5	CONN	2	6	298.893
27	207	TA	2	6	273.601
28	181.5	BM	2	6	239.501
29	191	BMTA	2	6	299.994
30	180.5	CONN	2	6	298.793
31	242	TA	2	6	296.39
32	260	BM	2	6	296.891
33	191	BMTA	2	6	285.813
34	211	CONN	2	6	289.183
35	228	TA	2	6	*
36	192	BM	2	6	300.361
37	226	BM	2	6	300.06
38	212	BMTA	2	6	274.636
39	267	CONP	2	6	300.294
40	268	TA	2	6	300.294
41	288	CONN	3	1	167.431
42	234.5	TA	3	1	268.463
43	189.5	BMTA	3	1	144.241
44	180	CONP	3	1	263.625
45	230	CONN	3	1	209.038
46	144.5	CONP	3	1	300.461
47	165.5	TA	3	1	260.055
48	206	CONP	3	1	205.902
49	235	BM	3	1	238.367
50	274	BMTA	3	1	44.5102
51	201	TA	3	1	245.44
52	169.5	CONP	3	1	300.06
53	190.5	CONN	3	1	128.793
54	174.5	CONP	3	1	253.682
55	227	BM	3	1	249.511
56	198	BMTA	3	1	151.882
57	183	CONN	3	1	230.492
58	189	TA	3	1	248.343
59	233	BM	3	1	258.553
60	226	BMTA	3	1	299.693
41	288	CONN	3	2	250.445
42	234.5	TA	3	2	291.886
43	189.5	BMTA	3	2	261.856
44	180	CONP	3	2	273.901
45	230	CONN	3	2	269.831
46	144.5	CONP	3	2	291.585
47	165.5	TA	3	2	283.644
48	206	CONP	3	2	258.787
49	235	BM	3	2	288.215
50	274	BMTA	3	2	180.21
51	201	TA	3	2	286.681
52	169.5	CONP	3	2	288.382
53	190.5	CONN	3	2	209.705
54	174.5	CONP	3	2	271.633
55	227	BM	3	2	263.291
56	198	BMTA	3	2	196.492
57	183	CONN	3	2	230.959
58	189	TA	3	2	255.884
59	233	BM	3	2	286.08
60	226	BMTA	3	2	299.894
41	288	CONN	3	3	7.44062
42	234.5	TA	3	3	271.199
43	189.5	BMTA	3	3	63.4955
44	180	CONP	3	3	296.624
45	230	CONN	3	3	66.8321
46	144.5	CONP	3	3	300.961
47	165.5	TA	3	3	294.288
48	206	CONP	3	3	289.617
49	235	BM	3	3	283.578
50	274	BMTA	3	3	96.6279
51	201	TA	3	3	0
52	169.5	CONP	3	3	285.613
53	190.5	CONN	3	3	190.92
54	174.5	CONP	3	3	299.26
55	227	BM	3	3	288.349
56	198	BMTA	3	3	196.993
57	183	CONN	3	3	69.7683
58	189	TA	3	3	280.708
59	233	BM	3	3	301.695
60	226	BMTA	3	3	299.994
41	288	CONN	3	4	207.537
42	234.5	TA	3	4	276.938
43	189.5	BMTA	3	4	163.36
44	180	CONP	3	4	285.613
45	230	CONN	3	4	226.355
46	144.5	CONP	3	4	272.967
47	165.5	TA	3	4	283.678
48	206	CONP	3	4	211.507
49	235	BM	3	4	280.842
50	274	BMTA	3	4	186.282
51	201	TA	3	4	272.1
52	169.5	CONP	3	4	299.393
53	190.5	CONN	3	4	143.908
54	174.5	CONP	3	4	234.263
55	227	BM	3	4	261.423
56	198	BMTA	3	4	158.055
57	183	CONN	3	4	262.824
58	189	TA	3	4	284.512
59	233	BM	3	4	290.751
60	226	BMTA	3	4	284.278
41	288	CONN	3	5	285.613
42	234.5	TA	3	5	271.699
43	189.5	BMTA	3	5	211.007
44	180	CONP	3	5	294.622
45	230	CONN	3	5	247.943
46	144.5	CONP	3	5	262.757
47	165.5	TA	3	5	295.456
48	206	CONP	3	5	272.367
49	235	BM	3	5	283.778
50	274	BMTA	3	5	272.367
51	201	TA	3	5	278.74
52	169.5	CONP	3	5	256.518
53	190.5	CONN	3	5	208.17
54	174.5	CONP	3	5	267.729
55	227	BM	3	5	286.614
56	198	BMTA	3	5	224.753
57	183	CONN	3	5	261.323
58	189	TA	3	5	132.763
59	233	BM	3	5	0
60	226	BMTA	3	5	210.373
41	288	CONN	3	6	189.018
42	234.5	TA	3	6	261.289
43	189.5	BMTA	3	6	237.532
44	180	CONP	3	6	270.098
45	230	CONN	3	6	252.514
46	144.5	CONP	3	6	287.148
47	165.5	TA	3	6	43.1756
48	206	CONP	3	6	236.265
49	235	BM	3	6	*
50	274	BMTA	3	6	227.656
51	201	TA	3	6	275.036
52	169.5	CONP	3	6	90.522
53	190.5	CONN	3	6	203.666
54	174.5	CONP	3	6	*
55	227	BM	3	6	265.794
56	198	BMTA	3	6	106.271
57	183	CONN	3	6	86.6849
58	189	TA	3	6	280.074
59	233	BM	3	6	262.624
60	226	BMTA	3	6	278.606

## Sheet: Behaviour - lie
CALF NUMBER	WEIGHT	TREATMENT	DAY	TIMEPOINT	DURATION (S)
1	232	CONN	1	1	0
2	210	CONP	1	1	0
3	271	TA	1	1	0
4	122.5	CONP	1	1	0
5	275	BM	1	1	3.36997
6	150	BMTA	1	1	0
7	282	CONP	1	1	0
8	203	CONN	1	1	0
9	197	TA	1	1	0
10	155.5	CONP	1	1	0
11	160.5	BM	1	1	0
12	235	BMTA	1	1	0
13	111	CONN	1	1	0
14	165	CONN	1	1	0
15	230	TA	1	1	0
16	269	BM	1	1	0
17	164	TA	1	1	0
18	195	BM	1	1	0
19	216	BMTA	1	1	0
20	157	BMTA	1	1	0
1	232	CONN	1	2	0
2	210	CONP	1	2	0
3	271	TA	1	2	0
4	122.5	CONP	1	2	0
5	275	BM	1	2	0
6	150	BMTA	1	2	0
7	282	CONP	1	2	0
8	203	CONN	1	2	0
9	197	TA	1	2	0
10	155.5	CONP	1	2	0
11	160.5	BM	1	2	0
12	235	BMTA	1	2	0
13	111	CONN	1	2	0
14	165	CONN	1	2	0
15	230	TA	1	2	0
16	269	BM	1	2	0
17	164	TA	1	2	0
18	195	BM	1	2	0
19	216	BMTA	1	2	0
20	157	BMTA	1	2	0
1	232	CONN	1	3	0
2	210	CONP	1	3	0
3	271	TA	1	3	42.942
4	122.5	CONP	1	3	0
5	275	BM	1	3	0
6	150	BMTA	1	3	0
7	282	CONP	1	3	0
8	203	CONN	1	3	0
9	197	TA	1	3	148.412
10	155.5	CONP	1	3	0
11	160.5	BM	1	3	0
12	235	BMTA	1	3	0
13	111	CONN	1	3	*
14	165	CONN	1	3	0
15	230	TA	1	3	0
16	269	BM	1	3	0
17	164	TA	1	3	0
18	195	BM	1	3	0
19	216	BMTA	1	3	8.97545
20	157	BMTA	1	3	0
1	232	CONN	1	4	0
2	210	CONP	1	4	299.927
3	271	TA	1	4	0
4	122.5	CONP	1	4	0
5	275	BM	1	4	0
6	150	BMTA	1	4	0
7	282	CONP	1	4	0
8	203	CONN	1	4	101.299
9	197	TA	1	4	216.645
10	155.5	CONP	1	4	83.415
11	160.5	BM	1	4	306.267
12	235	BMTA	1	4	0
13	111	CONN	1	4	126.324
14	165	CONN	1	4	76.5416
15	230	TA	1	4	289.15
16	269	BM	1	4	199.529
17	164	TA	1	4	0
18	195	BM	1	4	308.769
19	216	BMTA	1	4	0
20	157	BMTA	1	4	0
1	232	CONN	1	5	0
2	210	CONP	1	5	0
3	271	TA	1	5	0
4	122.5	CONP	1	5	0
5	275	BM	1	5	0
6	150	BMTA	1	5	0
7	282	CONP	1	5	0
8	203	CONN	1	5	10.4102
9	197	TA	1	5	0
10	155.5	CONP	1	5	0
11	160.5	BM	1	5	0
12	235	BMTA	1	5	0
13	111	CONN	1	5	0
14	165	CONN	1	5	0
15	230	TA	1	5	0
16	269	BM	1	5	0
17	164	TA	1	5	10.5437
18	195	BM	1	5	0
19	216	BMTA	1	5	0
20	157	BMTA	1	5	4.20412
1	232	CONN	1	6	0
2	210	CONP	1	6	278.573
3	271	TA	1	6	242.804
4	122.5	CONP	1	6	0
5	275	BM	1	6	0
6	150	BMTA	1	6	0
7	282	CONP	1	6	0
8	203	CONN	1	6	0
9	197	TA	1	6	*
10	155.5	CONP	1	6	0
11	160.5	BM	1	6	255.984
12	235	BMTA	1	6	0
13	111	CONN	1	6	0
14	165	CONN	1	6	0
15	230	TA	1	6	0
16	269	BM	1	6	0
17	164	TA	1	6	0
18	195	BM	1	6	0
19	216	BMTA	1	6	0
20	157	BMTA	1	6	0
21	150	CONN	2	1	0
22	234	CONP	2	1	0
23	218	CONP	2	1	0
24	232	BM	2	1	0
25	187.5	BMTA	2	1	0
26	195.5	CONN	2	1	0
27	207	TA	2	1	0
28	181.5	BM	2	1	0
29	191	BMTA	2	1	0
30	180.5	CONN	2	1	0
31	242	TA	2	1	0
32	260	BM	2	1	0
33	191	BMTA	2	1	*
34	211	CONN	2	1	0
35	228	TA	2	1	0
36	192	BM	2	1	0
37	226	BM	2	1	0
38	212	BMTA	2	1	0
39	267	CONP	2	1	0
40	268	TA	2	1	0
21	150	CONN	2	2	0
22	234	CONP	2	2	0
23	218	CONP	2	2	0
24	232	BM	2	2	0
25	187.5	BMTA	2	2	0
26	195.5	CONN	2	2	0
27	207	TA	2	2	0
28	181.5	BM	2	2	302.329
29	191	BMTA	2	2	0
30	180.5	CONN	2	2	302.596
31	242	TA	2	2	0
32	260	BM	2	2	0
33	191	BMTA	2	2	*
34	211	CONN	2	2	0
35	228	TA	2	2	0
36	192	BM	2	2	0
37	226	BM	2	2	0
38	212	BMTA	2	2	0
39	267	CONP	2	2	0
40	268	TA	2	2	0
21	150	CONN	2	3	192.288
22	234	CONP	2	3	0
23	218	CONP	2	3	0
24	232	BM	2	3	0
25	187.5	BMTA	2	3	0
26	195.5	CONN	2	3	0
27	207	TA	2	3	0
28	181.5	BM	2	3	0
29	191	BMTA	2	3	0
30	180.5	CONN	2	3	0
31	242	TA	2	3	0
32	260	BM	2	3	0
33	191	BMTA	2	3	0
34	211	CONN	2	3	0
35	228	TA	2	3	156.92
36	192	BM	2	3	0
37	226	BM	2	3	0
38	212	BMTA	2	3	0
39	267	CONP	2	3	0
40	268	TA	2	3	0
21	150	CONN	2	4	0
22	234	CONP	2	4	0
23	218	CONP	2	4	0
24	232	BM	2	4	0
25	187.5	BMTA	2	4	0
26	195.5	CONN	2	4	0
27	207	TA	2	4	0
28	181.5	BM	2	4	0
29	191	BMTA	2	4	0
30	180.5	CONN	2	4	0
31	242	TA	2	4	0
32	260	BM	2	4	0
33	191	BMTA	2	4	0
34	211	CONN	2	4	0
35	228	TA	2	4	0
36	192	BM	2	4	0
37	226	BM	2	4	0
38	212	BMTA	2	4	0
39	267	CONP	2	4	0
40	268	TA	2	4	0
21	150	CONN	2	5	210.539
22	234	CONP	2	5	299.86
23	218	CONP	2	5	1.4681
24	232	BM	2	5	4.33758
25	187.5	BMTA	2	5	0
26	195.5	CONN	2	5	197.894
27	207	TA	2	5	0
28	181.5	BM	2	5	103.702
29	191	BMTA	2	5	0
30	180.5	CONN	2	5	0
31	242	TA	2	5	0
32	260	BM	2	5	0
33	191	BMTA	2	5	186.382
34	211	CONN	2	5	0
35	228	TA	2	5	0
36	192	BM	2	5	0
37	226	BM	2	5	0
38	212	BMTA	2	5	0
39	267	CONP	2	5	300.394
40	268	TA	2	5	25.2914
21	150	CONN	2	6	0
22	234	CONP	2	6	0
23	218	CONP	2	6	0
24	232	BM	2	6	0
25	187.5	BMTA	2	6	13.0461
26	195.5	CONN	2	6	0
27	207	TA	2	6	0
28	181.5	BM	2	6	0
29	191	BMTA	2	6	0
30	180.5	CONN	2	6	0
31	242	TA	2	6	0
32	260	BM	2	6	0
33	191	BMTA	2	6	0
34	211	CONN	2	6	0
35	228	TA	2	6	*
36	192	BM	2	6	0
37	226	BM	2	6	0
38	212	BMTA	2	6	0
39	267	CONP	2	6	0
40	268	TA	2	6	0
41	288	CONN	3	1	0
42	234.5	TA	3	1	0
43	189.5	BMTA	3	1	0
44	180	CONP	3	1	0
45	230	CONN	3	1	0
46	144.5	CONP	3	1	0
47	165.5	TA	3	1	0
48	206	CONP	3	1	0
49	235	BM	3	1	0
50	274	BMTA	3	1	0
51	201	TA	3	1	0
52	169.5	CONP	3	1	0
53	190.5	CONN	3	1	0
54	174.5	CONP	3	1	0
55	227	BM	3	1	0
56	198	BMTA	3	1	0
57	183	CONN	3	1	0
58	189	TA	3	1	0
59	233	BM	3	1	0
60	226	BMTA	3	1	0
41	288	CONN	3	2	0
42	234.5	TA	3	2	0
43	189.5	BMTA	3	2	0
44	180	CONP	3	2	0
45	230	CONN	3	2	0
46	144.5	CONP	3	2	0
47	165.5	TA	3	2	0
48	206	CONP	3	2	0
49	235	BM	3	2	0
50	274	BMTA	3	2	0
51	201	TA	3	2	0
52	169.5	CONP	3	2	0
53	190.5	CONN	3	2	0
54	174.5	CONP	3	2	0
55	227	BM	3	2	0
56	198	BMTA	3	2	0
57	183	CONN	3	2	0
58	189	TA	3	2	0
59	233	BM	3	2	0
60	226	BMTA	3	2	0
41	288	CONN	3	3	290.584
42	234.5	TA	3	3	0
43	189.5	BMTA	3	3	234.196
44	180	CONP	3	3	0
45	230	CONN	3	3	230.159
46	144.5	CONP	3	3	0
47	165.5	TA	3	3	0
48	206	CONP	3	3	0
49	235	BM	3	3	0
50	274	BMTA	3	3	178.341
51	201	TA	3	3	298.592
52	169.5	CONP	3	3	0
53	190.5	CONN	3	3	0
54	174.5	CONP	3	3	0
55	227	BM	3	3	0
56	198	BMTA	3	3	0
57	183	CONN	3	3	196.159
58	189	TA	3	3	0
59	233	BM	3	3	0
60	226	BMTA	3	3	0
41	288	CONN	3	4	0
42	234.5	TA	3	4	0
43	189.5	BMTA	3	4	0
44	180	CONP	3	4	0
45	230	CONN	3	4	0
46	144.5	CONP	3	4	0
47	165.5	TA	3	4	0
48	206	CONP	3	4	0
49	235	BM	3	4	0
50	274	BMTA	3	4	0
51	201	TA	3	4	12.4122
52	169.5	CONP	3	4	0
53	190.5	CONN	3	4	0
54	174.5	CONP	3	4	0
55	227	BM	3	4	0
56	198	BMTA	3	4	0
57	183	CONN	3	4	0
58	189	TA	3	4	0
59	233	BM	3	4	0
60	226	BMTA	3	4	0
41	288	CONN	3	5	0
42	234.5	TA	3	5	0
43	189.5	BMTA	3	5	0
44	180	CONP	3	5	0
45	230	CONN	3	5	0
46	144.5	CONP	3	5	0
47	165.5	TA	3	5	0
48	206	CONP	3	5	0
49	235	BM	3	5	0
50	274	BMTA	3	5	6.8734
51	201	TA	3	5	0
52	169.5	CONP	3	5	0
53	190.5	CONN	3	5	0
54	174.5	CONP	3	5	0
55	227	BM	3	5	0
56	198	BMTA	3	5	3.06967
57	183	CONN	3	5	0
58	189	TA	3	5	150.147
59	233	BM	3	5	299.426
60	226	BMTA	3	5	63.0951
41	288	CONN	3	6	0
42	234.5	TA	3	6	0
43	189.5	BMTA	3	6	0
44	180	CONP	3	6	0
45	230	CONN	3	6	0
46	144.5	CONP	3	6	0
47	165.5	TA	3	6	251.746
48	206	CONP	3	6	0
49	235	BM	3	6	*
50	274	BMTA	3	6	47.6466
51	201	TA	3	6	0
52	169.5	CONP	3	6	186.282
53	190.5	CONN	3	6	0
54	174.5	CONP	3	6	*
55	227	BM	3	6	0
56	198	BMTA	3	6	118.683
57	183	CONN	3	6	187.317
58	189	TA	3	6	0
59	233	BM	3	6	0
60	226	BMTA	3	6	0

## Sheet: Behaviour - head down
CALF NUMBER	WEIGHT	TREATMENT	DAY	TIMEPOINT	DURATION (S)
1	232	CONN	1	1	39.1383
2	210	CONP	1	1	20.8538
3	271	TA	1	1	42.1079
4	122.5	CONP	1	1	0
5	275	BM	1	1	20.9872
6	150	BMTA	1	1	1.96859
7	282	CONP	1	1	2.03533
8	203	CONN	1	1	32.6987
9	197	TA	1	1	17.2169
10	155.5	CONP	1	1	0.50049
11	160.5	BM	1	1	10.1766
12	235	BMTA	1	1	0
13	111	CONN	1	1	5.43866
14	165	CONN	1	1	24.3905
15	230	TA	1	1	0
16	269	BM	1	1	2.20216
17	164	TA	1	1	5.03827
18	195	BM	1	1	77.6093
19	216	BMTA	1	1	10.3101
20	157	BMTA	1	1	0
21	150	CONN	2	1	136.867
22	234	CONP	2	1	0
23	218	CONP	2	1	0
24	232	BM	2	1	13.8803
25	187.5	BMTA	2	1	68.8674
26	195.5	CONN	2	1	0.900882
27	207	TA	2	1	0
28	181.5	BM	2	1	9.87634
29	191	BMTA	2	1	17.9175
30	180.5	CONN	2	1	0
31	242	TA	2	1	0
32	260	BM	2	1	6.40627
33	191	BMTA	2	1	*
34	211	CONN	2	1	0
35	228	TA	2	1	20.2532
36	192	BM	2	1	8.5417
37	226	BM	2	1	53.4857
38	212	BMTA	2	1	54.3198
39	267	CONP	2	1	0
40	268	TA	2	1	0
41	288	CONN	3	1	11.7115
42	234.5	TA	3	1	0
43	189.5	BMTA	3	1	9.20902
44	180	CONP	3	1	0
45	230	CONN	3	1	0.900882
46	144.5	CONP	3	1	0
47	165.5	TA	3	1	26.7262
48	206	CONP	3	1	5.70559
49	235	BM	3	1	39.5053
50	274	BMTA	3	1	8.27477
51	201	TA	3	1	3.36997
52	169.5	CONP	3	1	0
53	190.5	CONN	3	1	12.3121
54	174.5	CONP	3	1	0
55	227	BM	3	1	53.3522
56	198	BMTA	3	1	28.8616
57	183	CONN	3	1	11.211
58	189	TA	3	1	3.63689
59	233	BM	3	1	18.8852
60	226	BMTA	3	1	0
1	232	CONN	1	2	0
2	210	CONP	1	2	5.03827
3	271	TA	1	2	591.846
4	122.5	CONP	1	2	0
5	275	BM	1	2	0
6	150	BMTA	1	2	0
7	282	CONP	1	2	12.4789
8	203	CONN	1	2	10.1766
9	197	TA	1	2	49.8822
10	155.5	CONP	1	2	0
11	160.5	BM	1	2	0
12	235	BMTA	1	2	20.9538
13	111	CONN	1	2	293.688
14	165	CONN	1	2	12.7124
15	230	TA	1	2	0
16	269	BM	1	2	11.0441
17	164	TA	1	2	24.1903
18	195	BM	1	2	53.9862
19	216	BMTA	1	2	0
20	157	BMTA	1	2	171.201
21	150	CONN	2	2	182.078
22	234	CONP	2	2	0
23	218	CONP	2	2	0
24	232	BM	2	2	43.6427
25	187.5	BMTA	2	2	19.4524
26	195.5	CONN	2	2	50.1825
27	207	TA	2	2	7.17369
28	181.5	BM	2	2	0
29	191	BMTA	2	2	3.97055
30	180.5	CONN	2	2	0
31	242	TA	2	2	18.7851
32	260	BM	2	2	13.1462
33	191	BMTA	2	2	*
34	211	CONN	2	2	0
35	228	TA	2	2	0
36	192	BM	2	2	0
37	226	BM	2	2	0
38	212	BMTA	2	2	61.1599
39	267	CONP	2	2	65.5976
40	268	TA	2	2	0
41	288	CONN	3	2	0
42	234.5	TA	3	2	0
43	189.5	BMTA	3	2	58.9244
44	180	CONP	3	2	0
45	230	CONN	3	2	0
46	144.5	CONP	3	2	0
47	165.5	TA	3	2	125.823
48	206	CONP	3	2	0
49	235	BM	3	2	24.6241
50	274	BMTA	3	2	0
51	201	TA	3	2	0
52	169.5	CONP	3	2	0
53	190.5	CONN	3	2	48.1138
54	174.5	CONP	3	2	0
55	227	BM	3	2	33.3326
56	198	BMTA	3	2	0.367026
57	183	CONN	3	2	13.58
58	189	TA	3	2	0
59	233	BM	3	2	0
60	226	BMTA	3	2	0
1	232	CONN	1	3	13.3464
2	210	CONP	1	3	0
3	271	TA	1	3	0.734052
4	122.5	CONP	1	3	59.7919
5	275	BM	1	3	0
6	150	BMTA	1	3	8.27477
7	282	CONP	1	3	0
8	203	CONN	1	3	271.866
9	197	TA	1	3	97.7624
10	155.5	CONP	1	3	0.467124
11	160.5	BM	1	3	1.73503
12	235	BMTA	1	3	0
13	111	CONN	1	3	*
14	165	CONN	1	3	0
15	230	TA	1	3	62.0274
16	269	BM	1	3	0
17	164	TA	1	3	114.612
18	195	BM	1	3	8.77526
19	216	BMTA	1	3	32.9656
20	157	BMTA	1	3	8.10794
21	150	CONN	2	3	49.1148
22	234	CONP	2	3	12.8459
23	218	CONP	2	3	88.7202
24	232	BM	2	3	150.748
25	187.5	BMTA	2	3	0
26	195.5	CONN	2	3	52.785
27	207	TA	2	3	0
28	181.5	BM	2	3	0
29	191	BMTA	2	3	0
30	180.5	CONN	2	3	0
31	242	TA	2	3	50.8498
32	260	BM	2	3	30.6634
33	191	BMTA	2	3	0
34	211	CONN	2	3	0
35	228	TA	2	3	43.209
36	192	BM	2	3	118.483
37	226	BM	2	3	6.80666
38	212	BMTA	2	3	158.989
39	267	CONP	2	3	91.0224
40	268	TA	2	3	0
41	288	CONN	3	3	0
42	234.5	TA	3	3	19.3856
43	189.5	BMTA	3	3	7.60745
44	180	CONP	3	3	0
45	230	CONN	3	3	12.212
46	144.5	CONP	3	3	0
47	165.5	TA	3	3	50.416
48	206	CONP	3	3	0
49	235	BM	3	3	55.2875
50	274	BMTA	3	3	50.8498
51	201	TA	3	3	0
52	169.5	CONP	3	3	0
53	190.5	CONN	3	3	19.3856
54	174.5	CONP	3	3	0
55	227	BM	3	3	13.0127
56	198	BMTA	3	3	2.40235
57	183	CONN	3	3	40.1727
58	189	TA	3	3	0
59	233	BM	3	3	0
60	226	BMTA	3	3	0
1	232	CONN	1	4	0
2	210	CONP	1	4	0
3	271	TA	1	4	67.0657
4	122.5	CONP	1	4	109.073
5	275	BM	1	4	0
6	150	BMTA	1	4	0
7	282	CONP	1	4	44.4435
8	203	CONN	1	4	11.0775
9	197	TA	1	4	62.1609
10	155.5	CONP	1	4	231.827
11	160.5	BM	1	4	94.9263
12	235	BMTA	1	4	0
13	111	CONN	1	4	247.776
14	165	CONN	1	4	72.4376
15	230	TA	1	4	0
16	269	BM	1	4	20.4867
17	164	TA	1	4	112.043
18	195	BM	1	4	44.6103
19	216	BMTA	1	4	0
20	157	BMTA	1	4	86.8851
21	150	CONN	2	4	226.622
22	234	CONP	2	4	0
23	218	CONP	2	4	0
24	232	BM	2	4	20.8538
25	187.5	BMTA	2	4	56.0549
26	195.5	CONN	2	4	0
27	207	TA	2	4	0
28	181.5	BM	2	4	16.2492
29	191	BMTA	2	4	0
30	180.5	CONN	2	4	2.80274
31	242	TA	2	4	0
32	260	BM	2	4	13.2129
33	191	BMTA	2	4	28.0608
34	211	CONN	2	4	13.7468
35	228	TA	2	4	282.777
36	192	BM	2	4	27.8606
37	226	BM	2	4	2.63591
38	212	BMTA	2	4	0
39	267	CONP	2	4	58.6241
40	268	TA	2	4	0
41	288	CONN	3	4	15.7154
42	234.5	TA	3	4	0
43	189.5	BMTA	3	4	74.6064
44	180	CONP	3	4	12.6123
45	230	CONN	3	4	6.94013
46	144.5	CONP	3	4	0
47	165.5	TA	3	4	3.87046
48	206	CONP	3	4	12.4789
49	235	BM	3	4	0
50	274	BMTA	3	4	0
51	201	TA	3	4	9.9097
52	169.5	CONP	3	4	0
53	190.5	CONN	3	4	0
54	174.5	CONP	3	4	11.4779
55	227	BM	3	4	12.1452
56	198	BMTA	3	4	0
57	183	CONN	3	4	0
58	189	TA	3	4	0
59	233	BM	3	4	0
60	226	BMTA	3	4	0
1	232	CONN	1	5	0
2	210	CONP	1	5	0
3	271	TA	1	5	54.0196
4	122.5	CONP	1	5	0
5	275	BM	1	5	0
6	150	BMTA	1	5	0
7	282	CONP	1	5	0
8	203	CONN	1	5	39.3051
9	197	TA	1	5	13.0795
10	155.5	CONP	1	5	0
11	160.5	BM	1	5	0
12	235	BMTA	1	5	0
13	111	CONN	1	5	13.7134
14	165	CONN	1	5	0
15	230	TA	1	5	101.633
16	269	BM	1	5	0
17	164	TA	1	5	41.6408
18	195	BM	1	5	0
19	216	BMTA	1	5	0
20	157	BMTA	1	5	0
21	150	CONN	2	5	86.2511
22	234	CONP	2	5	0
23	218	CONP	2	5	8.57506
24	232	BM	2	5	137.435
25	187.5	BMTA	2	5	27.6938
26	195.5	CONN	2	5	10.2767
27	207	TA	2	5	0
28	181.5	BM	2	5	30.4632
29	191	BMTA	2	5	0
30	180.5	CONN	2	5	4.8047
31	242	TA	2	5	129.293
32	260	BM	2	5	17.0167
33	191	BMTA	2	5	24.0235
34	211	CONN	2	5	10.6771
35	228	TA	2	5	297.558
36	192	BM	2	5	32.5652
37	226	BM	2	5	16.683
38	212	BMTA	2	5	187.517
39	267	CONP	2	5	0
40	268	TA	2	5	8.97545
41	288	CONN	3	5	1.33464
42	234.5	TA	3	5	79.1775
43	189.5	BMTA	3	5	79.3777
44	180	CONP	3	5	0
45	230	CONN	3	5	4.47104
46	144.5	CONP	3	5	0
47	165.5	TA	3	5	144.675
48	206	CONP	3	5	0
49	235	BM	3	5	0
50	274	BMTA	3	5	0
51	201	TA	3	5	12.7792
52	169.5	CONP	3	5	0
53	190.5	CONN	3	5	0
54	174.5	CONP	3	5	82.9812
55	227	BM	3	5	14.4141
56	198	BMTA	3	5	0
57	183	CONN	3	5	12.7792
58	189	TA	3	5	11.3111
59	233	BM	3	5	0
60	226	BMTA	3	5	53.419
1	232	CONN	1	6	0
2	210	CONP	1	6	23.9902
3	271	TA	1	6	0
4	122.5	CONP	1	6	7.40725
5	275	BM	1	6	0
6	150	BMTA	1	6	38.471
7	282	CONP	1	6	90.0882
8	203	CONN	1	6	0
9	197	TA	1	6	*
10	155.5	CONP	1	6	69.2678
11	160.5	BM	1	6	10.7772
12	235	BMTA	1	6	0
13	111	CONN	1	6	0
14	165	CONN	1	6	0
15	230	TA	1	6	16.9833
16	269	BM	1	6	0
17	164	TA	1	6	46.7791
18	195	BM	1	6	0
19	216	BMTA	1	6	13.0795
20	157	BMTA	1	6	28.7949
21	150	CONN	2	6	299.894
22	234	CONP	2	6	299.56
23	218	CONP	2	6	0
24	232	BM	2	6	0
25	187.5	BMTA	2	6	151.348
26	195.5	CONN	2	6	0
27	207	TA	2	6	0
28	181.5	BM	2	6	0
29	191	BMTA	2	6	0
30	180.5	CONN	2	6	0.633954
31	242	TA	2	6	21.0539
32	260	BM	2	6	16.2826
33	191	BMTA	2	6	8.67516
34	211	CONN	2	6	0
35	228	TA	2	6	*
36	192	BM	2	6	0
37	226	BM	2	6	0
38	212	BMTA	2	6	250.946
39	267	CONP	2	6	0
40	268	TA	2	6	0
41	288	CONN	3	6	45.4779
42	234.5	TA	3	6	15.6153
43	189.5	BMTA	3	6	19.419
44	180	CONP	3	6	2.50245
45	230	CONN	3	6	7.20706
46	144.5	CONP	3	6	5.60549
47	165.5	TA	3	6	0
48	206	CONP	3	6	51.3169
49	235	BM	3	6	*
50	274	BMTA	3	6	0
51	201	TA	3	6	0
52	169.5	CONP	3	6	0
53	190.5	CONN	3	6	8.94209
54	174.5	CONP	3	6	*
55	227	BM	3	6	33.7664
56	198	BMTA	3	6	0
57	183	CONN	3	6	11.211
58	189	TA	3	6	11.3444
59	233	BM	3	6	0
60	226	BMTA	3	6	0

## Sheet: Behaviour - eat
CALF NUMBER	WEIGHT	TREATMENT	DAY	TIMEPOINT	DURATION (S)
1	232	CONN	1	1	0
2	210	CONP	1	1	0
3	271	TA	1	1	33.6329
4	122.5	CONP	1	1	124.589
5	275	BM	1	1	0
6	150	BMTA	1	1	40.3061
7	282	CONP	1	1	90.0548
8	203	CONN	1	1	0
9	197	TA	1	1	0
10	155.5	CONP	1	1	11.9784
11	160.5	BM	1	1	0
12	235	BMTA	1	1	3.63689
13	111	CONN	1	1	0
14	165	CONN	1	1	0
15	230	TA	1	1	170.167
16	269	BM	1	1	224.787
17	164	TA	1	1	0
18	195	BM	1	1	0
19	216	BMTA	1	1	29.3287
20	157	BMTA	1	1	0
21	150	CONN	2	1	0
22	234	CONP	2	1	299.96
23	218	CONP	2	1	300.194
24	232	BM	2	1	0
25	187.5	BMTA	2	1	0
26	195.5	CONN	2	1	0
27	207	TA	2	1	0
28	181.5	BM	2	1	0
29	191	BMTA	2	1	0
30	180.5	CONN	2	1	0
31	242	TA	2	1	0
32	260	BM	2	1	0
33	191	BMTA	2	1	*
34	211	CONN	2	1	298.726
35	228	TA	2	1	0
36	192	BM	2	1	0
37	226	BM	2	1	0
38	212	BMTA	2	1	0
39	267	CONP	2	1	300.427
40	268	TA	2	1	0
41	288	CONN	3	1	0
42	234.5	TA	3	1	109.541
43	189.5	BMTA	3	1	0
44	180	CONP	3	1	140.137
45	230	CONN	3	1	0
46	144.5	CONP	3	1	300.094
47	165.5	TA	3	1	0
48	206	CONP	3	1	0
49	235	BM	3	1	0
50	274	BMTA	3	1	0
51	201	TA	3	1	0
52	169.5	CONP	3	1	299.46
53	190.5	CONN	3	1	0
54	174.5	CONP	3	1	192.989
55	227	BM	3	1	0
56	198	BMTA	3	1	0
57	183	CONN	3	1	0
58	189	TA	3	1	0
59	233	BM	3	1	0
60	226	BMTA	3	1	299.326
1	232	CONN	1	2	0
2	210	CONP	1	2	109.797
3	271	TA	1	2	45.5112
4	122.5	CONP	1	2	269.197
5	275	BM	1	2	181.878
6	150	BMTA	1	2	298.062
7	282	CONP	1	2	222.184
8	203	CONN	1	2	219.115
9	197	TA	1	2	133.664
10	155.5	CONP	1	2	276.004
11	160.5	BM	1	2	168.331
12	235	BMTA	1	2	171.168
13	111	CONN	1	2	488.445
14	165	CONN	1	2	0
15	230	TA	1	2	154.151
16	269	BM	1	2	0
17	164	TA	1	2	0
18	195	BM	1	2	22.4553
19	216	BMTA	1	2	25.7586
20	157	BMTA	1	2	0
21	150	CONN	2	2	0
22	234	CONP	2	2	300.06
23	218	CONP	2	2	156.053
24	232	BM	2	2	0
25	187.5	BMTA	2	2	0
26	195.5	CONN	2	2	0
27	207	TA	2	2	0
28	181.5	BM	2	2	0
29	191	BMTA	2	2	0
30	180.5	CONN	2	2	0
31	242	TA	2	2	0
32	260	BM	2	2	249.044
33	191	BMTA	2	2	*
34	211	CONN	2	2	287.448
35	228	TA	2	2	0
36	192	BM	2	2	139.003
37	226	BM	2	2	213.642
38	212	BMTA	2	2	0
39	267	CONP	2	2	0
40	268	TA	2	2	300.461
41	288	CONN	3	2	0
42	234.5	TA	3	2	299.627
43	189.5	BMTA	3	2	0
44	180	CONP	3	2	246.341
45	230	CONN	3	2	0
46	144.5	CONP	3	2	289.984
47	165.5	TA	3	2	0
48	206	CONP	3	2	130.227
49	235	BM	3	2	0
50	274	BMTA	3	2	83.5485
51	201	TA	3	2	40.4396
52	169.5	CONP	3	2	293.888
53	190.5	CONN	3	2	0
54	174.5	CONP	3	2	243.238
55	227	BM	3	2	0
56	198	BMTA	3	2	16.5162
57	183	CONN	3	2	250.579
58	189	TA	3	2	0
59	233	BM	3	2	0
60	226	BMTA	3	2	299.326
1	232	CONN	1	3	0
2	210	CONP	1	3	0
3	271	TA	1	3	2.00196
4	122.5	CONP	1	3	124.822
5	275	BM	1	3	0
6	150	BMTA	1	3	167.364
7	282	CONP	1	3	722.474
8	203	CONN	1	3	281.109
9	197	TA	1	3	0
10	155.5	CONP	1	3	0
11	160.5	BM	1	3	269.063
12	235	BMTA	1	3	0
13	111	CONN	1	3	*
14	165	CONN	1	3	0
15	230	TA	1	3	0
16	269	BM	1	3	302.696
17	164	TA	1	3	0
18	195	BM	1	3	0
19	216	BMTA	1	3	2.66928
20	157	BMTA	1	3	0
21	150	CONN	2	3	0
22	234	CONP	2	3	0
23	218	CONP	2	3	5.40529
24	232	BM	2	3	3.10304
25	187.5	BMTA	2	3	0
26	195.5	CONN	2	3	0
27	207	TA	2	3	0
28	181.5	BM	2	3	0
29	191	BMTA	2	3	0
30	180.5	CONN	2	3	299.16
31	242	TA	2	3	0
32	260	BM	2	3	0
33	191	BMTA	2	3	235.597
34	211	CONN	2	3	0
35	228	TA	2	3	0
36	192	BM	2	3	0
37	226	BM	2	3	0
38	212	BMTA	2	3	0
39	267	CONP	2	3	0
40	268	TA	2	3	0
41	288	CONN	3	3	0
42	234.5	TA	3	3	60.7261
43	189.5	BMTA	3	3	0
44	180	CONP	3	3	204.5
45	230	CONN	3	3	0
46	144.5	CONP	3	3	300.761
47	165.5	TA	3	3	0
48	206	CONP	3	3	0
49	235	BM	3	3	0
50	274	BMTA	3	3	0
51	201	TA	3	3	0
52	169.5	CONP	3	3	256.585
53	190.5	CONN	3	3	0
54	174.5	CONP	3	3	0
55	227	BM	3	3	0
56	198	BMTA	3	3	25.9587
57	183	CONN	3	3	0
58	189	TA	3	3	0
59	233	BM	3	3	301.262
60	226	BMTA	3	3	285.813
1	232	CONN	1	4	0
2	210	CONP	1	4	0
3	271	TA	1	4	0
4	122.5	CONP	1	4	53.6859
5	275	BM	1	4	0
6	150	BMTA	1	4	302.53
7	282	CONP	1	4	71.0696
8	203	CONN	1	4	0
9	197	TA	1	4	0
10	155.5	CONP	1	4	0
11	160.5	BM	1	4	0
12	235	BMTA	1	4	212.708
13	111	CONN	1	4	0
14	165	CONN	1	4	64.5632
15	230	TA	1	4	0
16	269	BM	1	4	0
17	164	TA	1	4	138.636
18	195	BM	1	4	0
19	216	BMTA	1	4	277.305
20	157	BMTA	1	4	0
21	150	CONN	2	4	0
22	234	CONP	2	4	300.06
23	218	CONP	2	4	299.66
24	232	BM	2	4	0
25	187.5	BMTA	2	4	0
26	195.5	CONN	2	4	250.145
27	207	TA	2	4	0
28	181.5	BM	2	4	206.936
29	191	BMTA	2	4	285.046
30	180.5	CONN	2	4	0
31	242	TA	2	4	0
32	260	BM	2	4	0
33	191	BMTA	2	4	0
34	211	CONN	2	4	0
35	228	TA	2	4	0
36	192	BM	2	4	0
37	226	BM	2	4	0
38	212	BMTA	2	4	303.731
39	267	CONP	2	4	0
40	268	TA	2	4	0
41	288	CONN	3	4	0
42	234.5	TA	3	4	71.6368
43	189.5	BMTA	3	4	0
44	180	CONP	3	4	0
45	230	CONN	3	4	0
46	144.5	CONP	3	4	146.41
47	165.5	TA	3	4	0
48	206	CONP	3	4	0
49	235	BM	3	4	186.716
50	274	BMTA	3	4	0
51	201	TA	3	4	0
52	169.5	CONP	3	4	298.926
53	190.5	CONN	3	4	0
54	174.5	CONP	3	4	0
55	227	BM	3	4	0
56	198	BMTA	3	4	0
57	183	CONN	3	4	0
58	189	TA	3	4	0
59	233	BM	3	4	0
60	226	BMTA	3	4	0
1	232	CONN	1	5	0
2	210	CONP	1	5	130.895
3	271	TA	1	5	0
4	122.5	CONP	1	5	302.663
5	275	BM	1	5	0
6	150	BMTA	1	5	286.914
7	282	CONP	1	5	294.689
8	203	CONN	1	5	0
9	197	TA	1	5	0
10	155.5	CONP	1	5	299.26
11	160.5	BM	1	5	99.6642
12	235	BMTA	1	5	164.795
13	111	CONN	1	5	0
14	165	CONN	1	5	0
15	230	TA	1	5	0
16	269	BM	1	5	0
17	164	TA	1	5	0
18	195	BM	1	5	0
19	216	BMTA	1	5	124.021
20	157	BMTA	1	5	6.13934
21	150	CONN	2	5	0
22	234	CONP	2	5	0
23	218	CONP	2	5	0
24	232	BM	2	5	0
25	187.5	BMTA	2	5	142.339
26	195.5	CONN	2	5	0
27	207	TA	2	5	0
28	181.5	BM	2	5	64.2629
29	191	BMTA	2	5	63.1952
30	180.5	CONN	2	5	0
31	242	TA	2	5	0
32	260	BM	2	5	0
33	191	BMTA	2	5	0
34	211	CONN	2	5	38.4043
35	228	TA	2	5	0
36	192	BM	2	5	0
37	226	BM	2	5	0
38	212	BMTA	2	5	0
39	267	CONP	2	5	0
40	268	TA	2	5	25.9587
41	288	CONN	3	5	0
42	234.5	TA	3	5	0
43	189.5	BMTA	3	5	0
44	180	CONP	3	5	0
45	230	CONN	3	5	14.3474
46	144.5	CONP	3	5	0
47	165.5	TA	3	5	0
48	206	CONP	3	5	0
49	235	BM	3	5	117.582
50	274	BMTA	3	5	0
51	201	TA	3	5	0
52	169.5	CONP	3	5	0
53	190.5	CONN	3	5	0
54	174.5	CONP	3	5	0
55	227	BM	3	5	226.822
56	198	BMTA	3	5	0
57	183	CONN	3	5	0
58	189	TA	3	5	0
59	233	BM	3	5	0
60	226	BMTA	3	5	0
1	232	CONN	1	6	174.771
2	210	CONP	1	6	0
3	271	TA	1	6	0
4	122.5	CONP	1	6	133.998
5	275	BM	1	6	0
6	150	BMTA	1	6	0
7	282	CONP	1	6	0
8	203	CONN	1	6	0
9	197	TA	1	6	*
10	155.5	CONP	1	6	0
11	160.5	BM	1	6	0
12	235	BMTA	1	6	204.3
13	111	CONN	1	6	298.426
14	165	CONN	1	6	0
15	230	TA	1	6	0
16	269	BM	1	6	0
17	164	TA	1	6	0
18	195	BM	1	6	0
19	216	BMTA	1	6	70.3022
20	157	BMTA	1	6	54.52
21	150	CONN	2	6	0
22	234	CONP	2	6	0
23	218	CONP	2	6	0
24	232	BM	2	6	127.558
25	187.5	BMTA	2	6	0
26	195.5	CONN	2	6	0
27	207	TA	2	6	0
28	181.5	BM	2	6	175.505
29	191	BMTA	2	6	0
30	180.5	CONN	2	6	0
31	242	TA	2	6	0
32	260	BM	2	6	0
33	191	BMTA	2	6	0
34	211	CONN	2	6	0
35	228	TA	2	6	*
36	192	BM	2	6	0
37	226	BM	2	6	294.789
38	212	BMTA	2	6	0
39	267	CONP	2	6	299.96
40	268	TA	2	6	0
41	288	CONN	3	6	0
42	234.5	TA	3	6	0
43	189.5	BMTA	3	6	0
44	180	CONP	3	6	221.951
45	230	CONN	3	6	0
46	144.5	CONP	3	6	0
47	165.5	TA	3	6	0
48	206	CONP	3	6	0
49	235	BM	3	6	*
50	274	BMTA	3	6	0
51	201	TA	3	6	0
52	169.5	CONP	3	6	31.0971
53	190.5	CONN	3	6	0
54	174.5	CONP	3	6	*
55	227	BM	3	6	0
56	198	BMTA	3	6	0
57	183	CONN	3	6	0
58	189	TA	3	6	0
59	233	BM	3	6	138.402
60	226	BMTA	3	6	232.327

## Sheet: Behaviour - drink
CALF NUMBER	WEIGHT	TREATMENT	DAY	TIMEPOINT	DURATION (S)
1	232	CONN	1	1	0
2	210	CONP	1	1	22.1217
3	271	TA	1	1	0
4	122.5	CONP	1	1	56.3552
5	275	BM	1	1	0
6	150	BMTA	1	1	30.0294
7	282	CONP	1	1	88.9871
8	203	CONN	1	1	108.44
9	197	TA	1	1	53.3189
10	155.5	CONP	1	1	72.5377
11	160.5	BM	1	1	32.5318
12	235	BMTA	1	1	0
13	111	CONN	1	1	10.577
14	165	CONN	1	1	72.3375
15	230	TA	1	1	72.6044
16	269	BM	1	1	0
17	164	TA	1	1	0
18	195	BM	1	1	0
19	216	BMTA	1	1	0
20	157	BMTA	1	1	0
21	150	CONN	2	1	0
22	234	CONP	2	1	0
23	218	CONP	2	1	0
24	232	BM	2	1	0
25	187.5	BMTA	2	1	0
26	195.5	CONN	2	1	0
27	207	TA	2	1	0
28	181.5	BM	2	1	0
29	191	BMTA	2	1	0
30	180.5	CONN	2	1	0
31	242	TA	2	1	0
32	260	BM	2	1	0
33	191	BMTA	2	1	*
34	211	CONN	2	1	0
35	228	TA	2	1	0
36	192	BM	2	1	0
37	226	BM	2	1	0
38	212	BMTA	2	1	0
39	267	CONP	2	1	0
40	268	TA	2	1	0
41	288	CONN	3	1	0
42	234.5	TA	3	1	0
43	189.5	BMTA	3	1	0
44	180	CONP	3	1	0
45	230	CONN	3	1	0
46	144.5	CONP	3	1	0
47	165.5	TA	3	1	0
48	206	CONP	3	1	0
49	235	BM	3	1	0
50	274	BMTA	3	1	0
51	201	TA	3	1	0
52	169.5	CONP	3	1	0
53	190.5	CONN	3	1	0
54	174.5	CONP	3	1	0
55	227	BM	3	1	0
56	198	BMTA	3	1	0
57	183	CONN	3	1	0
58	189	TA	3	1	0
59	233	BM	3	1	0
60	226	BMTA	3	1	0
1	232	CONN	1	2	0
2	210	CONP	1	2	102.2
3	271	TA	1	2	65.2305
4	122.5	CONP	1	2	5.97251
5	275	BM	1	2	95.0597
6	150	BMTA	1	2	0
7	282	CONP	1	2	55.8881
8	203	CONN	1	2	28.4278
9	197	TA	1	2	0
10	155.5	CONP	1	2	0
11	160.5	BM	1	2	93.3247
12	235	BMTA	1	2	0
13	111	CONN	1	2	0
14	165	CONN	1	2	28.7281
15	230	TA	1	2	37.1697
16	269	BM	1	2	97.6623
17	164	TA	1	2	0
18	195	BM	1	2	14.5476
19	216	BMTA	1	2	49.1148
20	157	BMTA	1	2	0
21	150	CONN	2	2	0
22	234	CONP	2	2	0
23	218	CONP	2	2	10.9774
24	232	BM	2	2	0
25	187.5	BMTA	2	2	0
26	195.5	CONN	2	2	0
27	207	TA	2	2	0
28	181.5	BM	2	2	0
29	191	BMTA	2	2	0
30	180.5	CONN	2	2	0
31	242	TA	2	2	0
32	260	BM	2	2	0
33	191	BMTA	2	2	*
34	211	CONN	2	2	0
35	228	TA	2	2	0
36	192	BM	2	2	0
37	226	BM	2	2	0
38	212	BMTA	2	2	0
39	267	CONP	2	2	23.3896
40	268	TA	2	2	0
41	288	CONN	3	2	0
42	234.5	TA	3	2	0
43	189.5	BMTA	3	2	0
44	180	CONP	3	2	0
45	230	CONN	3	2	0
46	144.5	CONP	3	2	0
47	165.5	TA	3	2	0
48	206	CONP	3	2	0
49	235	BM	3	2	0
50	274	BMTA	3	2	0
51	201	TA	3	2	0
52	169.5	CONP	3	2	0
53	190.5	CONN	3	2	0
54	174.5	CONP	3	2	0
55	227	BM	3	2	0
56	198	BMTA	3	2	0
57	183	CONN	3	2	0
58	189	TA	3	2	0
59	233	BM	3	2	0
60	226	BMTA	3	2	0
1	232	CONN	1	3	0
2	210	CONP	1	3	0
3	271	TA	1	3	0
4	122.5	CONP	1	3	0
5	275	BM	1	3	0
6	150	BMTA	1	3	0
7	282	CONP	1	3	0
8	203	CONN	1	3	0
9	197	TA	1	3	0
10	155.5	CONP	1	3	0
11	160.5	BM	1	3	0
12	235	BMTA	1	3	0
13	111	CONN	1	3	*
14	165	CONN	1	3	0
15	230	TA	1	3	66.6653
16	269	BM	1	3	0
17	164	TA	1	3	0
18	195	BM	1	3	31.9313
19	216	BMTA	1	3	0
20	157	BMTA	1	3	0
21	150	CONN	2	3	0
22	234	CONP	2	3	28.9951
23	218	CONP	2	3	45.1776
24	232	BM	2	3	0
25	187.5	BMTA	2	3	0
26	195.5	CONN	2	3	19.1854
27	207	TA	2	3	0
28	181.5	BM	2	3	117.515
29	191	BMTA	2	3	0
30	180.5	CONN	2	3	0
31	242	TA	2	3	0
32	260	BM	2	3	8.04121
33	191	BMTA	2	3	0
34	211	CONN	2	3	16.2826
35	228	TA	2	3	0
36	192	BM	2	3	0
37	226	BM	2	3	0
38	212	BMTA	2	3	0
39	267	CONP	2	3	0
40	268	TA	2	3	0
41	288	CONN	3	3	0
42	234.5	TA	3	3	0
43	189.5	BMTA	3	3	0
44	180	CONP	3	3	0
45	230	CONN	3	3	0
46	144.5	CONP	3	3	0
47	165.5	TA	3	3	0
48	206	CONP	3	3	0
49	235	BM	3	3	0
50	274	BMTA	3	3	0
51	201	TA	3	3	0
52	169.5	CONP	3	3	0
53	190.5	CONN	3	3	0
54	174.5	CONP	3	3	0
55	227	BM	3	3	0
56	198	BMTA	3	3	0
57	183	CONN	3	3	0
58	189	TA	3	3	0
59	233	BM	3	3	0
60	226	BMTA	3	3	0
1	232	CONN	1	4	0
2	210	CONP	1	4	0
3	271	TA	1	4	0
4	122.5	CONP	1	4	0
5	275	BM	1	4	0
6	150	BMTA	1	4	0
7	282	CONP	1	4	96.8949
8	203	CONN	1	4	0
9	197	TA	1	4	0
10	155.5	CONP	1	4	0
11	160.5	BM	1	4	0
12	235	BMTA	1	4	0
13	111	CONN	1	4	0
14	165	CONN	1	4	0
15	230	TA	1	4	0
16	269	BM	1	4	0
17	164	TA	1	4	0
18	195	BM	1	4	0
19	216	BMTA	1	4	0
20	157	BMTA	1	4	0
21	150	CONN	2	4	0
22	234	CONP	2	4	0
23	218	CONP	2	4	0
24	232	BM	2	4	0
25	187.5	BMTA	2	4	0
26	195.5	CONN	2	4	0
27	207	TA	2	4	0
28	181.5	BM	2	4	0
29	191	BMTA	2	4	0
30	180.5	CONN	2	4	0
31	242	TA	2	4	0
32	260	BM	2	4	0
33	191	BMTA	2	4	0
34	211	CONN	2	4	0
35	228	TA	2	4	0
36	192	BM	2	4	0
37	226	BM	2	4	0
38	212	BMTA	2	4	0
39	267	CONP	2	4	0
40	268	TA	2	4	0
41	288	CONN	3	4	0
42	234.5	TA	3	4	0
43	189.5	BMTA	3	4	0
44	180	CONP	3	4	0
45	230	CONN	3	4	0
46	144.5	CONP	3	4	0
47	165.5	TA	3	4	0
48	206	CONP	3	4	0
49	235	BM	3	4	0
50	274	BMTA	3	4	0
51	201	TA	3	4	0
52	169.5	CONP	3	4	0
53	190.5	CONN	3	4	0
54	174.5	CONP	3	4	0
55	227	BM	3	4	0
56	198	BMTA	3	4	0
57	183	CONN	3	4	0
58	189	TA	3	4	0
59	233	BM	3	4	0
60	226	BMTA	3	4	0
1	232	CONN	1	5	0
2	210	CONP	1	5	30.3964
3	271	TA	1	5	0
4	122.5	CONP	1	5	0
5	275	BM	1	5	0
6	150	BMTA	1	5	0
7	282	CONP	1	5	0
8	203	CONN	1	5	0
9	197	TA	1	5	0
10	155.5	CONP	1	5	0
11	160.5	BM	1	5	0
12	235	BMTA	1	5	0
13	111	CONN	1	5	0
14	165	CONN	1	5	0
15	230	TA	1	5	0
16	269	BM	1	5	29.3287
17	164	TA	1	5	0
18	195	BM	1	5	0
19	216	BMTA	1	5	0
20	157	BMTA	1	5	0
21	150	CONN	2	5	0
22	234	CONP	2	5	0
23	218	CONP	2	5	0
24	232	BM	2	5	0
25	187.5	BMTA	2	5	0
26	195.5	CONN	2	5	0
27	207	TA	2	5	0
28	181.5	BM	2	5	0
29	191	BMTA	2	5	0
30	180.5	CONN	2	5	0
31	242	TA	2	5	0
32	260	BM	2	5	0
33	191	BMTA	2	5	0
34	211	CONN	2	5	0
35	228	TA	2	5	0
36	192	BM	2	5	0
37	226	BM	2	5	0
38	212	BMTA	2	5	0
39	267	CONP	2	5	0
40	268	TA	2	5	0
41	288	CONN	3	5	0
42	234.5	TA	3	5	9.20902
43	189.5	BMTA	3	5	0
44	180	CONP	3	5	0
45	230	CONN	3	5	0
46	144.5	CONP	3	5	24.4573
47	165.5	TA	3	5	0
48	206	CONP	3	5	0
49	235	BM	3	5	0
50	274	BMTA	3	5	0
51	201	TA	3	5	0
52	169.5	CONP	3	5	0
53	190.5	CONN	3	5	0
54	174.5	CONP	3	5	0
55	227	BM	3	5	0
56	198	BMTA	3	5	0
57	183	CONN	3	5	0
58	189	TA	3	5	0
59	233	BM	3	5	0
60	226	BMTA	3	5	0
1	232	CONN	1	6	0
2	210	CONP	1	6	0
3	271	TA	1	6	0
4	122.5	CONP	1	6	0
5	275	BM	1	6	0
6	150	BMTA	1	6	0
7	282	CONP	1	6	0
8	203	CONN	1	6	31.4308
9	197	TA	1	6	*
10	155.5	CONP	1	6	0
11	160.5	BM	1	6	0
12	235	BMTA	1	6	0
13	111	CONN	1	6	0
14	165	CONN	1	6	0
15	230	TA	1	6	0
16	269	BM	1	6	0
17	164	TA	1	6	0
18	195	BM	1	6	0
19	216	BMTA	1	6	0
20	157	BMTA	1	6	0
21	150	CONN	2	6	0
22	234	CONP	2	6	0
23	218	CONP	2	6	0
24	232	BM	2	6	0
25	187.5	BMTA	2	6	0
26	195.5	CONN	2	6	0
27	207	TA	2	6	0
28	181.5	BM	2	6	0
29	191	BMTA	2	6	0
30	180.5	CONN	2	6	0
31	242	TA	2	6	0
32	260	BM	2	6	0
33	191	BMTA	2	6	0
34	211	CONN	2	6	0
35	228	TA	2	6	*
36	192	BM	2	6	0
37	226	BM	2	6	0
38	212	BMTA	2	6	0
39	267	CONP	2	6	0
40	268	TA	2	6	0
41	288	CONN	3	6	0
42	234.5	TA	3	6	0
43	189.5	BMTA	3	6	0
44	180	CONP	3	6	0
45	230	CONN	3	6	0
46	144.5	CONP	3	6	0
47	165.5	TA	3	6	0
48	206	CONP	3	6	0
49	235	BM	3	6	*
50	274	BMTA	3	6	0
51	201	TA	3	6	0
52	169.5	CONP	3	6	0
53	190.5	CONN	3	6	0
54	174.5	CONP	3	6	*
55	227	BM	3	6	0
56	198	BMTA	3	6	0
57	183	CONN	3	6	0
58	189	TA	3	6	0
59	233	BM	3	6	0
60	226	BMTA	3	6	0

## Sheet: Behaviour - head shake
CALF NUMBER	WEIGHT	TREATMENT	DAY	TIMEPOINT	FREQUENCY
1	232	CONN	1	1	4
2	210	CONP	1	1	8
3	271	TA	1	1	5
4	122.5	CONP	1	1	18
5	275	BM	1	1	8
6	150	BMTA	1	1	2
7	282	CONP	1	1	3
8	203	CONN	1	1	2
9	197	TA	1	1	3
10	155.5	CONP	1	1	7
11	160.5	BM	1	1	3
12	235	BMTA	1	1	*
13	111	CONN	1	1	0
14	165	CONN	1	1	2
15	230	TA	1	1	3
16	269	BM	1	1	2
17	164	TA	1	1	4
18	195	BM	1	1	5
19	216	BMTA	1	1	4
20	157	BMTA	1	1	7
21	150	CONN	2	1	2
22	234	CONP	2	1	*
23	218	CONP	2	1	*
24	232	BM	2	1	15
25	187.5	BMTA	2	1	1
26	195.5	CONN	2	1	0
27	207	TA	2	1	2
28	181.5	BM	2	1	1
29	191	BMTA	2	1	0
30	180.5	CONN	2	1	1
31	242	TA	2	1	1
32	260	BM	2	1	0
33	191	BMTA	2	1	*
34	211	CONN	2	1	1
35	228	TA	2	1	1
36	192	BM	2	1	1
37	226	BM	2	1	1
38	212	BMTA	2	1	9
39	267	CONP	2	1	0
40	268	TA	2	1	1
41	288	CONN	3	1	7
42	234.5	TA	3	1	0
43	189.5	BMTA	3	1	*
44	180	CONP	3	1	0
45	230	CONN	3	1	1
46	144.5	CONP	3	1	*
47	165.5	TA	3	1	*
48	206	CONP	3	1	0
49	235	BM	3	1	5
50	274	BMTA	3	1	1
51	201	TA	3	1	2
52	169.5	CONP	3	1	*
53	190.5	CONN	3	1	0
54	174.5	CONP	3	1	0
55	227	BM	3	1	0
56	198	BMTA	3	1	5
57	183	CONN	3	1	1
58	189	TA	3	1	0
59	233	BM	3	1	0
60	226	BMTA	3	1	*
1	232	CONN	1	2	0
2	210	CONP	1	2	2
3	271	TA	1	2	5
4	122.5	CONP	1	2	*
5	275	BM	1	2	1
6	150	BMTA	1	2	*
7	282	CONP	1	2	1
8	203	CONN	1	2	0
9	197	TA	1	2	0
10	155.5	CONP	1	2	0
11	160.5	BM	1	2	0
12	235	BMTA	1	2	0
13	111	CONN	1	2	*
14	165	CONN	1	2	0
15	230	TA	1	2	0
16	269	BM	1	2	2
17	164	TA	1	2	0
18	195	BM	1	2	0
19	216	BMTA	1	2	8
20	157	BMTA	1	2	4
21	150	CONN	2	2	0
22	234	CONP	2	2	*
23	218	CONP	2	2	*
24	232	BM	2	2	11
25	187.5	BMTA	2	2	0
26	195.5	CONN	2	2	0
27	207	TA	2	2	1
28	181.5	BM	2	2	1
29	191	BMTA	2	2	0
30	180.5	CONN	2	2	*
31	242	TA	2	2	1
32	260	BM	2	2	0
33	191	BMTA	2	2	*
34	211	CONN	2	2	*
35	228	TA	2	2	0
36	192	BM	2	2	0
37	226	BM	2	2	0
38	212	BMTA	2	2	2
39	267	CONP	2	2	*
40	268	TA	2	2	0
41	288	CONN	3	2	0
42	234.5	TA	3	2	0
43	189.5	BMTA	3	2	*
44	180	CONP	3	2	1
45	230	CONN	3	2	0
46	144.5	CONP	3	2	*
47	165.5	TA	3	2	0
48	206	CONP	3	2	0
49	235	BM	3	2	4
50	274	BMTA	3	2	1
51	201	TA	3	2	*
52	169.5	CONP	3	2	*
53	190.5	CONN	3	2	0
54	174.5	CONP	3	2	0
55	227	BM	3	2	0
56	198	BMTA	3	2	2
57	183	CONN	3	2	0
58	189	TA	3	2	*
59	233	BM	3	2	*
60	226	BMTA	3	2	*
1	232	CONN	1	3	0
2	210	CONP	1	3	0
3	271	TA	1	3	0
4	122.5	CONP	1	3	1
5	275	BM	1	3	1
6	150	BMTA	1	3	1
7	282	CONP	1	3	*
8	203	CONN	1	3	0
9	197	TA	1	3	3
10	155.5	CONP	1	3	1
11	160.5	BM	1	3	0
12	235	BMTA	1	3	0
13	111	CONN	1	3	*
14	165	CONN	1	3	0
15	230	TA	1	3	0
16	269	BM	1	3	0
17	164	TA	1	3	8
18	195	BM	1	3	0
19	216	BMTA	1	3	3
20	157	BMTA	1	3	1
21	150	CONN	2	3	0
22	234	CONP	2	3	*
23	218	CONP	2	3	0
24	232	BM	2	3	3
25	187.5	BMTA	2	3	0
26	195.5	CONN	2	3	1
27	207	TA	2	3	1
28	181.5	BM	2	3	0
29	191	BMTA	2	3	0
30	180.5	CONN	2	3	0
31	242	TA	2	3	1
32	260	BM	2	3	0
33	191	BMTA	2	3	0
34	211	CONN	2	3	0
35	228	TA	2	3	0
36	192	BM	2	3	0
37	226	BM	2	3	1
38	212	BMTA	2	3	0
39	267	CONP	2	3	2
40	268	TA	2	3	1
41	288	CONN	3	3	*
42	234.5	TA	3	3	0
43	189.5	BMTA	3	3	0
44	180	CONP	3	3	1
45	230	CONN	3	3	0
46	144.5	CONP	3	3	*
47	165.5	TA	3	3	0
48	206	CONP	3	3	*
49	235	BM	3	3	1
50	274	BMTA	3	3	0
51	201	TA	3	3	*
52	169.5	CONP	3	3	0
53	190.5	CONN	3	3	0
54	174.5	CONP	3	3	*
55	227	BM	3	3	0
56	198	BMTA	3	3	0
57	183	CONN	3	3	0
58	189	TA	3	3	0
59	233	BM	3	3	*
60	226	BMTA	3	3	*
1	232	CONN	1	4	0
2	210	CONP	1	4	0
3	271	TA	1	4	8
4	122.5	CONP	1	4	5
5	275	BM	1	4	2
6	150	BMTA	1	4	0
7	282	CONP	1	4	1
8	203	CONN	1	4	8
9	197	TA	1	4	2
10	155.5	CONP	1	4	6
11	160.5	BM	1	4	2
12	235	BMTA	1	4	1
13	111	CONN	1	4	1
14	165	CONN	1	4	3
15	230	TA	1	4	0
16	269	BM	1	4	0
17	164	TA	1	4	2
18	195	BM	1	4	0
19	216	BMTA	1	4	0
20	157	BMTA	1	4	5
21	150	CONN	2	4	0
22	234	CONP	2	4	*
23	218	CONP	2	4	1
24	232	BM	2	4	2
25	187.5	BMTA	2	4	0
26	195.5	CONN	2	4	0
27	207	TA	2	4	2
28	181.5	BM	2	4	0
29	191	BMTA	2	4	0
30	180.5	CONN	2	4	0
31	242	TA	2	4	0
32	260	BM	2	4	1
33	191	BMTA	2	4	0
34	211	CONN	2	4	0
35	228	TA	2	4	1
36	192	BM	2	4	3
37	226	BM	2	4	0
38	212	BMTA	2	4	0
39	267	CONP	2	4	0
40	268	TA	2	4	1
41	288	CONN	3	4	0
42	234.5	TA	3	4	1
43	189.5	BMTA	3	4	*
44	180	CONP	3	4	*
45	230	CONN	3	4	*
46	144.5	CONP	3	4	1
47	165.5	TA	3	4	0
48	206	CONP	3	4	0
49	235	BM	3	4	0
50	274	BMTA	3	4	0
51	201	TA	3	4	0
52	169.5	CONP	3	4	*
53	190.5	CONN	3	4	*
54	174.5	CONP	3	4	1
55	227	BM	3	4	0
56	198	BMTA	3	4	1
57	183	CONN	3	4	*
58	189	TA	3	4	0
59	233	BM	3	4	0
60	226	BMTA	3	4	0
1	232	CONN	1	5	0
2	210	CONP	1	5	0
3	271	TA	1	5	5
4	122.5	CONP	1	5	0
5	275	BM	1	5	1
6	150	BMTA	1	5	2
7	282	CONP	1	5	0
8	203	CONN	1	5	5
9	197	TA	1	5	0
10	155.5	CONP	1	5	7
11	160.5	BM	1	5	2
12	235	BMTA	1	5	0
13	111	CONN	1	5	1
14	165	CONN	1	5	0
15	230	TA	1	5	0
16	269	BM	1	5	4
17	164	TA	1	5	3
18	195	BM	1	5	21
19	216	BMTA	1	5	9
20	157	BMTA	1	5	9
21	150	CONN	2	5	0
22	234	CONP	2	5	*
23	218	CONP	2	5	2
24	232	BM	2	5	0
25	187.5	BMTA	2	5	0
26	195.5	CONN	2	5	3
27	207	TA	2	5	*
28	181.5	BM	2	5	2
29	191	BMTA	2	5	0
30	180.5	CONN	2	5	5
31	242	TA	2	5	18
32	260	BM	2	5	3
33	191	BMTA	2	5	5
34	211	CONN	2	5	2
35	228	TA	2	5	*
36	192	BM	2	5	6
37	226	BM	2	5	2
38	212	BMTA	2	5	1
39	267	CONP	2	5	0
40	268	TA	2	5	7
41	288	CONN	3	5	2
42	234.5	TA	3	5	0
43	189.5	BMTA	3	5	0
44	180	CONP	3	5	0
45	230	CONN	3	5	0
46	144.5	CONP	3	5	0
47	165.5	TA	3	5	*
48	206	CONP	3	5	1
49	235	BM	3	5	0
50	274	BMTA	3	5	5
51	201	TA	3	5	3
52	169.5	CONP	3	5	0
53	190.5	CONN	3	5	*
54	174.5	CONP	3	5	0
55	227	BM	3	5	4
56	198	BMTA	3	5	1
57	183	CONN	3	5	0
58	189	TA	3	5	2
59	233	BM	3	5	*
60	226	BMTA	3	5	*
1	232	CONN	1	6	2
2	210	CONP	1	6	1
3	271	TA	1	6	13
4	122.5	CONP	1	6	3
5	275	BM	1	6	3
6	150	BMTA	1	6	0
7	282	CONP	1	6	4
8	203	CONN	1	6	2
9	197	TA	1	6	*
10	155.5	CONP	1	6	13
11	160.5	BM	1	6	3
12	235	BMTA	1	6	0
13	111	CONN	1	6	8
14	165	CONN	1	6	0
15	230	TA	1	6	2
16	269	BM	1	6	4
17	164	TA	1	6	1
18	195	BM	1	6	24
19	216	BMTA	1	6	26
20	157	BMTA	1	6	53
21	150	CONN	2	6	0
22	234	CONP	2	6	*
23	218	CONP	2	6	0
24	232	BM	2	6	0
25	187.5	BMTA	2	6	0
26	195.5	CONN	2	6	0
27	207	TA	2	6	0
28	181.5	BM	2	6	0
29	191	BMTA	2	6	*
30	180.5	CONN	2	6	5
31	242	TA	2	6	27
32	260	BM	2	6	0
33	191	BMTA	2	6	0
34	211	CONN	2	6	0
35	228	TA	2	6	*
36	192	BM	2	6	0
37	226	BM	2	6	2
38	212	BMTA	2	6	0
39	267	CONP	2	6	0
40	268	TA	2	6	0
41	288	CONN	3	6	0
42	234.5	TA	3	6	0
43	189.5	BMTA	3	6	1
44	180	CONP	3	6	0
45	230	CONN	3	6	*
46	144.5	CONP	3	6	1
47	165.5	TA	3	6	*
48	206	CONP	3	6	1
49	235	BM	3	6	*
50	274	BMTA	3	6	1
51	201	TA	3	6	6
52	169.5	CONP	3	6	0
53	190.5	CONN	3	6	0
54	174.5	CONP	3	6	*
55	227	BM	3	6	8
56	198	BMTA	3	6	0
57	183	CONN	3	6	1
58	189	TA	3	6	7
59	233	BM	3	6	0
60	226	BMTA	3	6	1

[truncated: 6 more sheets: Behaviour - head turn, Behaviour - head paw, Behaviour - kick, Behaviour - stamp, Behaviour - ear flick, Behaviour - tail flick]
